# Supplementary material
Source: PubMed Central journal article supplement (PMC4955926)
Supplement: DC160513SupplementaryData.pdf [file DC160513SupplementaryData.pdf]

## SUPPLEMENTARY DATA

### Supplementary Figure 1.

#### PubMed

(((((type 2 diabetes[Title/Abstract] OR type II diabetes[Title/Abstract] OR non-insulin diabetes[Title/Abstract]) AND (monounsaturated[Title/Abstract] OR polyunsaturated[Title/Abstract] OR fat[Title/Abstract] OR fatty acid[Title/Abstract] OR MUFA[Title/Abstract] OR PUFA[Title/Abstract] OR omega-6[Title/Abstract] OR n-6[Title/Abstract])) AND (glycemic[Title/Abstract] OR glucose[Title/Abstract] OR hba1c[Title/Abstract] OR lipid[Title/Abstract] OR cholesterol[Title/Abstract])) NOT (exercise[Title/Abstract] OR physical activity[Title/Abstract] OR metformin[Title/Abstract] OR acarbose[Title/Abstract] OR pioglitazone[Title/Abstract] OR rosiglitazone[Title/Abstract] OR sitagliptin[Title/Abstract] OR bi-guanide[Title/Abstract] OR troglitazone[Title/Abstract] OR fish oils[Title/Abstract] OR omega-3[Title/Abstract] OR n-3[Title/Abstract] OR marine[Title/Abstract] OR simvastatin[Title/Abstract] OR pravastatin[Title/Abstract] OR supplements[Title/Abstract])) NOT (children[Title/Abstract] OR adolescent[Title/Abstract])) NOT (type 1 diabetes[Title/Abstract] OR type I diabetes[Title/Abstract] OR impaired glucose tolerance[Title/Abstract] OR prediabetes[Title/Abstract])) AND (trial[Title/Abstract] OR randomized[Title/Abstract]) AND (Clinical Trial[ptyp] AND hasabstract[text] AND ("0001/01/01"[PDAT] : "2015/03/31"[PDAT]) AND "humans"[MeSH Terms] AND English[lang]) AND (Clinical Trial[ptyp] AND hasabstract[text] AND ("0001/01/01"[PDAT] : "2015/03/31"[PDAT]) AND "humans"[MeSH Terms] AND English[lang])

Records found: 220

SUPPLEMENTARY DATA

**Supplementary Table 1. Inclusion/exclusion criteria for literature search**

| Considered items                    | Inclusion                                                                                  | Exclusion                                                                                                                                                                              |
|-------------------------------------|--------------------------------------------------------------------------------------------|----------------------------------------------------------------------------------------------------------------------------------------------------------------------------------------|
| Study type                          | Randomized controlled trials, controlled-feeding studies                                   | Not an interventional study, observational studies, reviews, conference proceedings                                                                                                    |
| Study population/disease indication | Adults with confirmed type II diabetes mellitus or non-insulin dependent diabetes mellitus | Conditions that are not type II diabetes (or non-insulin dependent diabetes), including: type I diabetes, children with type I or II diabetes, prediabetes, impaired glucose tolerance |
| Intervention                        | Monounsaturated or polyunsaturated fatty acids (mainly omega-6 fatty acids)                | Unspecified dietary changes, change in physical activity, dietary pattern change, omega-3 fatty acids, medications, supplements instead of dietary changes                             |
| Outcomes                            | Glycemic control, blood lipids, body measurements, blood pressure                          | No outcomes reported                                                                                                                                                                   |
| Publication date range              | Up to March 2015                                                                           |                                                                                                                                                                                        |
| Language restriction                | English only                                                                               | Not English                                                                                                                                                                            |
| Other                               | Human trials only                                                                          | Non-human animal trials, no full text, or non-English                                                                                                                                  |

SUPPLEMENTARY DATA

**Supplementary Table 2. Assessment of publication bias**

| Metabolic parameter             | Number of studies | Number of participants | <i>P</i> -value <sup>1</sup> | <i>P</i> -value <sup>2</sup> |
|---------------------------------|-------------------|------------------------|------------------------------|------------------------------|
| HbA1c (%)                       | 14                | 925                    | 0.509                        | 0.608                        |
| Fasting plasma glucose (mmol/L) | 22                | 1283                   | 0.148                        | <b>0.049</b>                 |
| Fasting insulin (pmol/L)        | 11                | 679                    | 0.493                        | 0.401                        |
| LDL cholesterol (mmol/L)        | 17                | 791                    | <b>0.044</b>                 | 0.138                        |
| HDL cholesterol (mmol/L)        | 20                | 1067                   | 0.672                        | 0.315                        |
| Triglycerides (mmol/L)          | 21                | 1075                   | 0.413                        | 0.555                        |
| Weight (kg)                     | 16                | 1081                   | 0.304                        | 0.083                        |
| Systolic blood pressure (mmHg)  | 6                 | 529                    | 0.224                        | 0.492                        |
| Diastolic blood pressure (mmHg) | 5                 | 373                    | 0.050                        | 0.119                        |

CI: confidence interval; HbA1c: glycated hemoglobin; LDL: low-density lipoprotein; HDL: high-density lipoprotein

Bolded values indicate statistical significance at  $P < 0.05$ .

**Notes:**

[1] *P*-value calculated from the Begg-Mazudumar test for assessing small effect size.

[2] *P*-value calculated from the Egger test for assessing small effect size.

SUPPLEMENTARY DATA

Supplementary Figure 2. Forest plots of main outcomes using random-effects model

HbA1c (%)

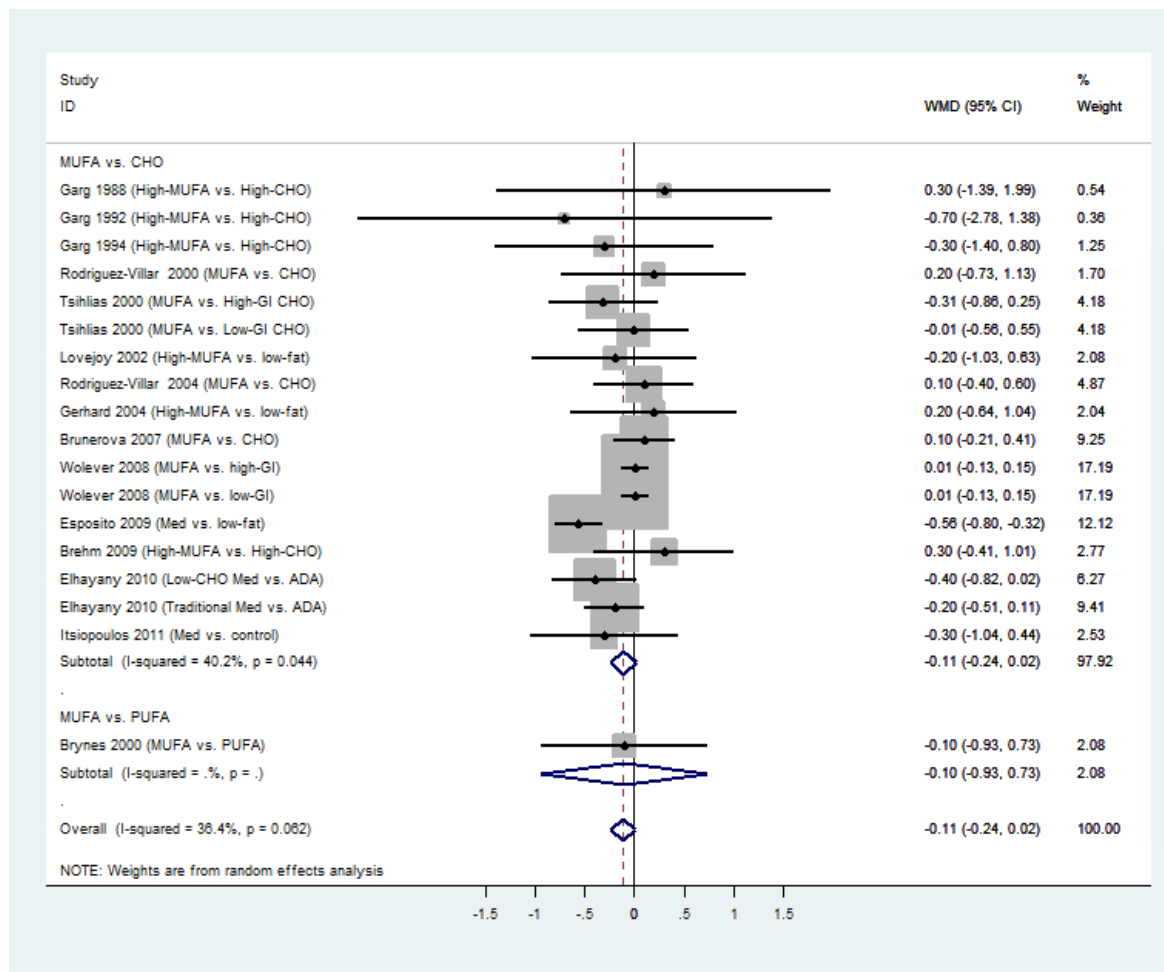

SUPPLEMENTARY DATA

Fasting plasma glucose (mmol/L)

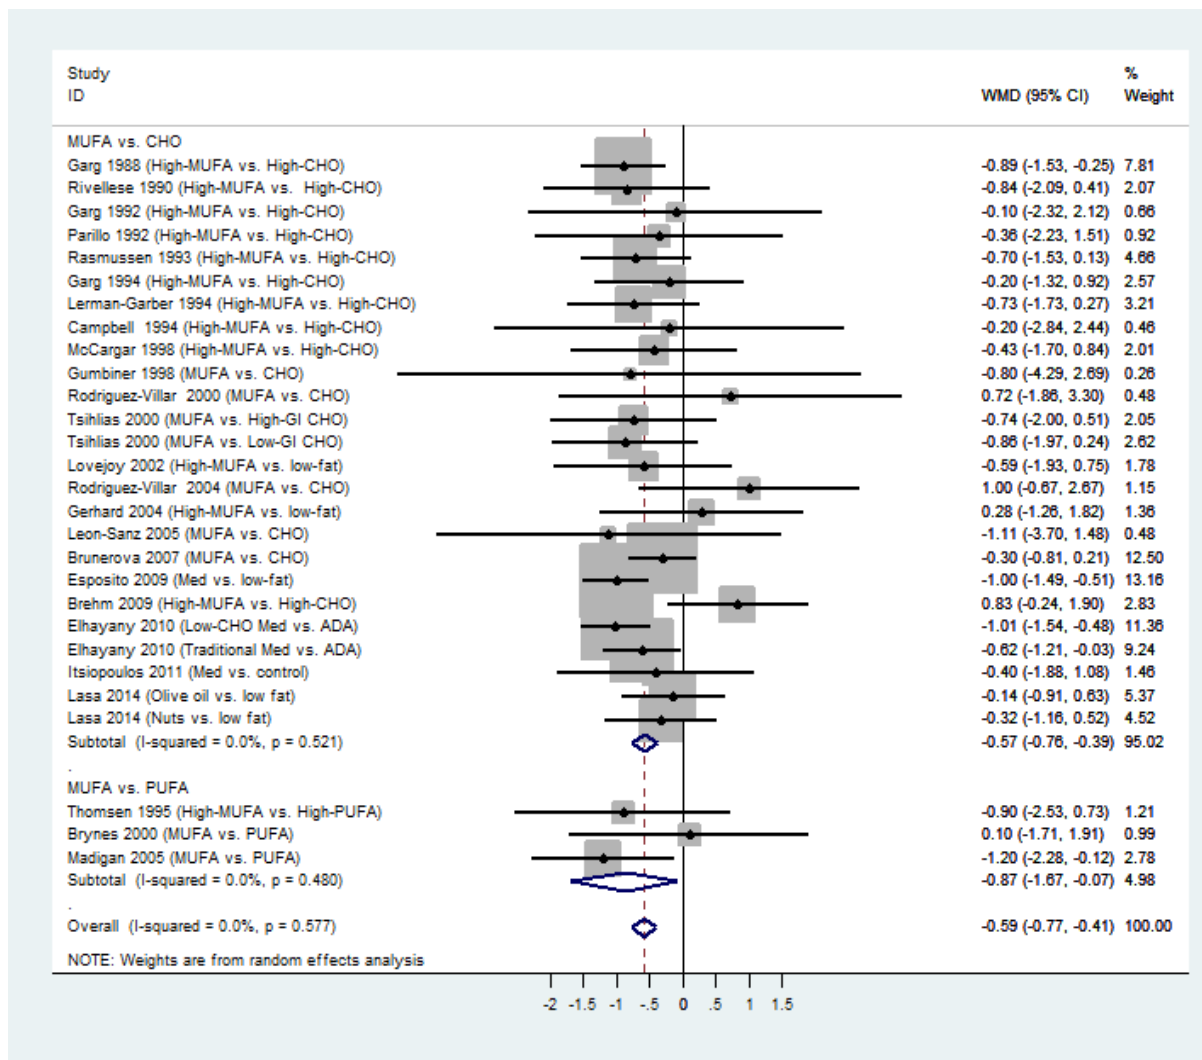

SUPPLEMENTARY DATA

Triglycerides (mmol/L)

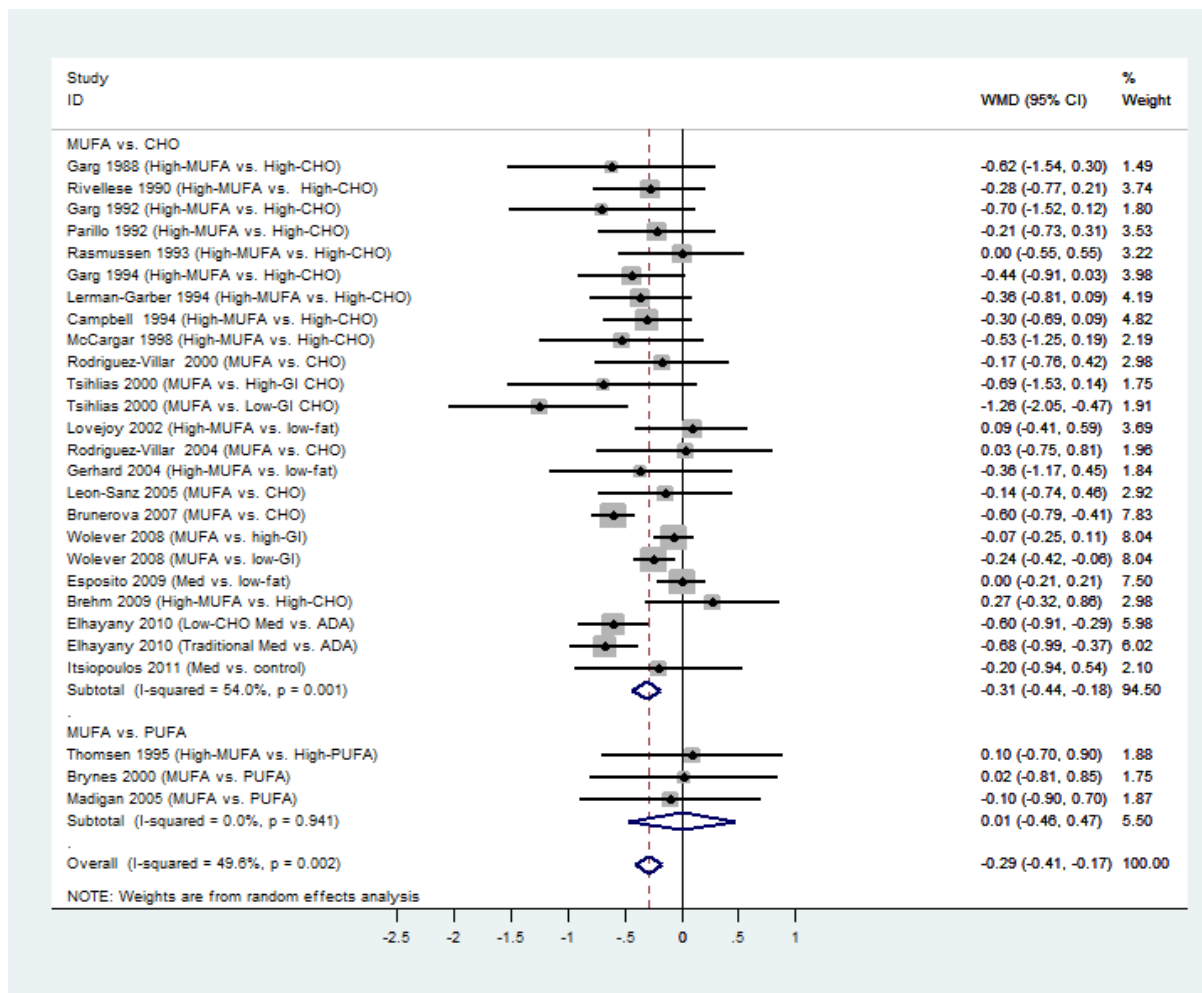

SUPPLEMENTARY DATA

Body weight (kg)

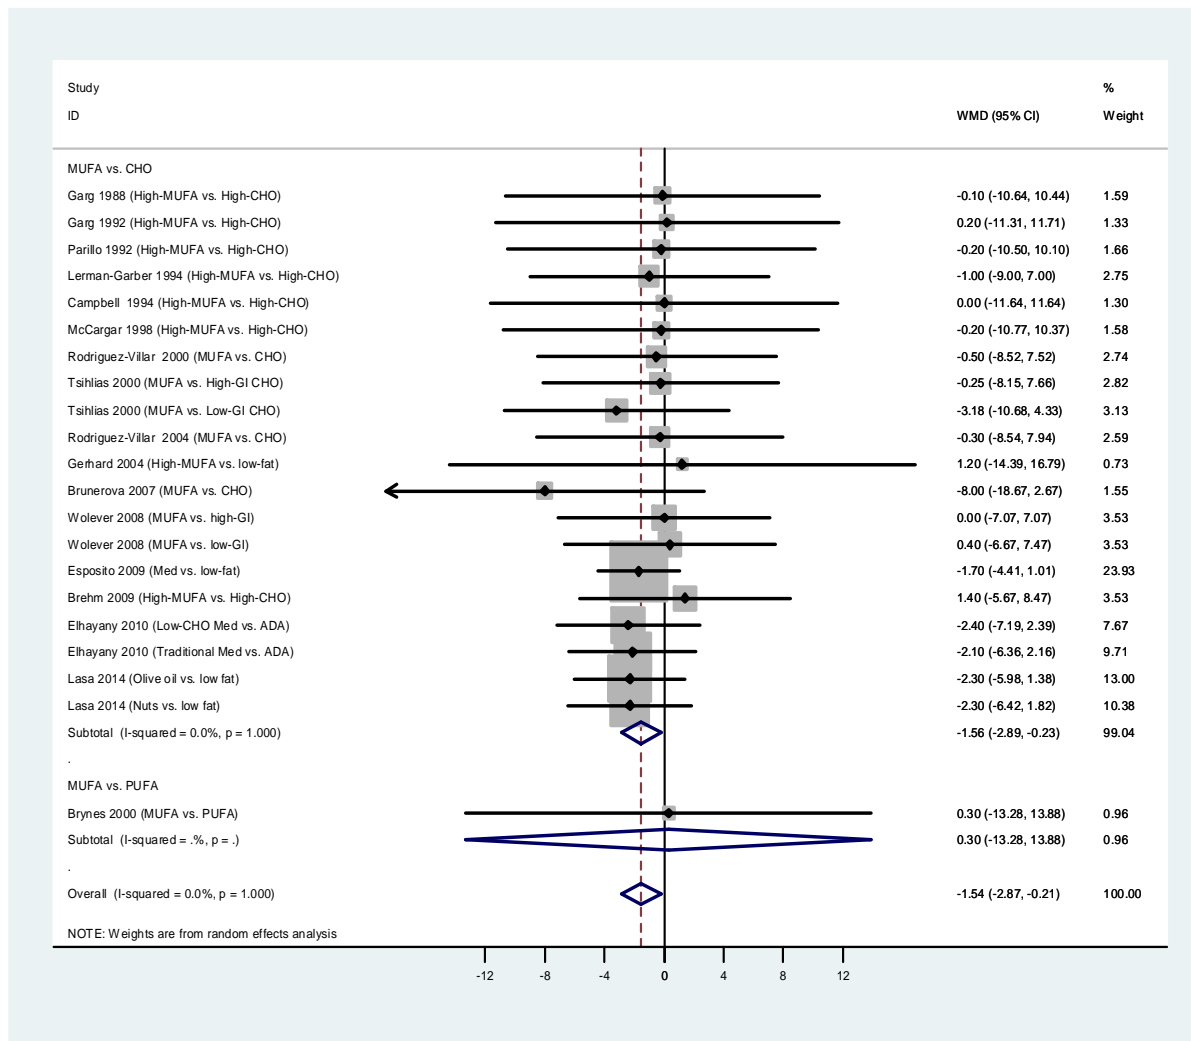

SUPPLEMENTARY DATA

Fasting insulin (pmol/L)

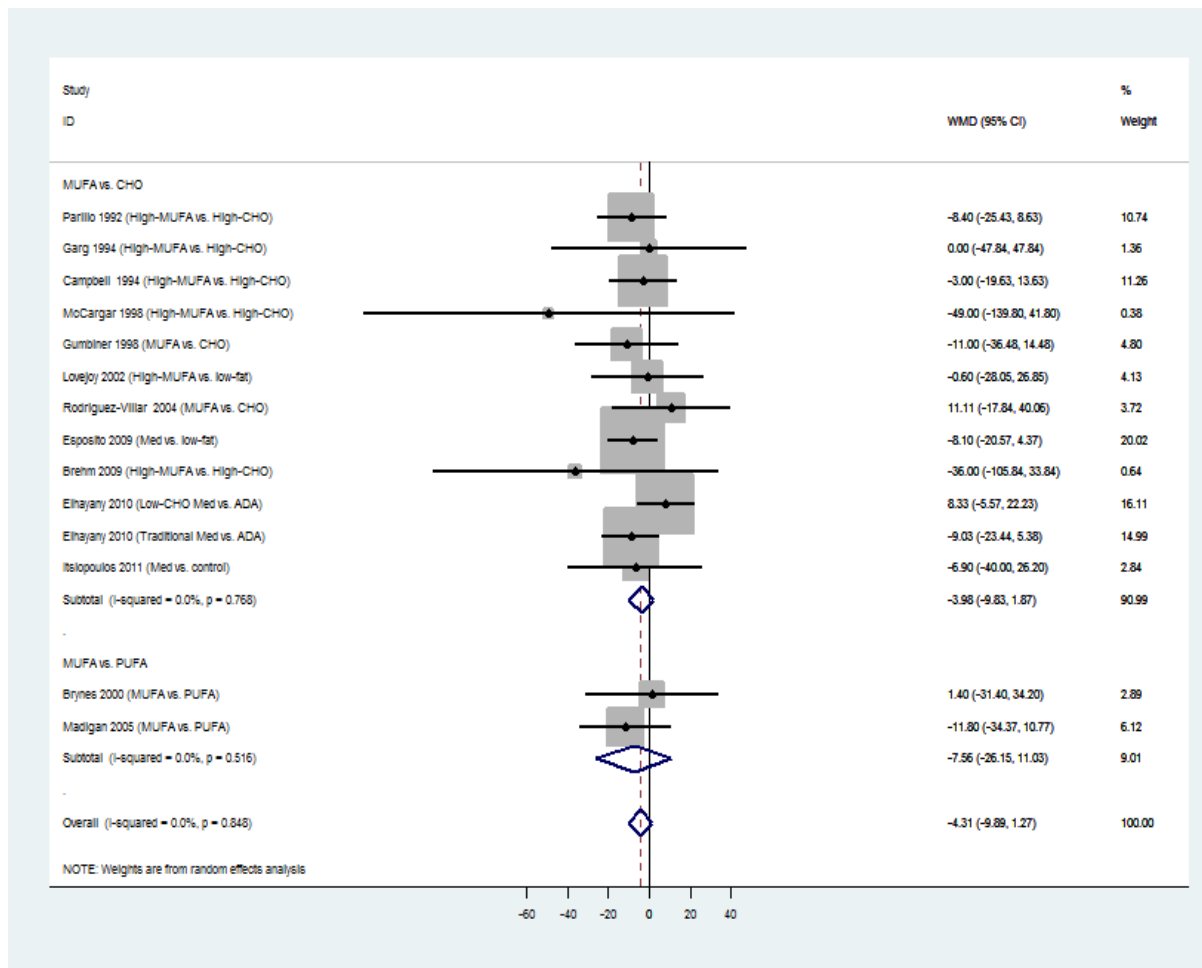



SUPPLEMENTARY DATA

Systolic blood pressure (mmHg)

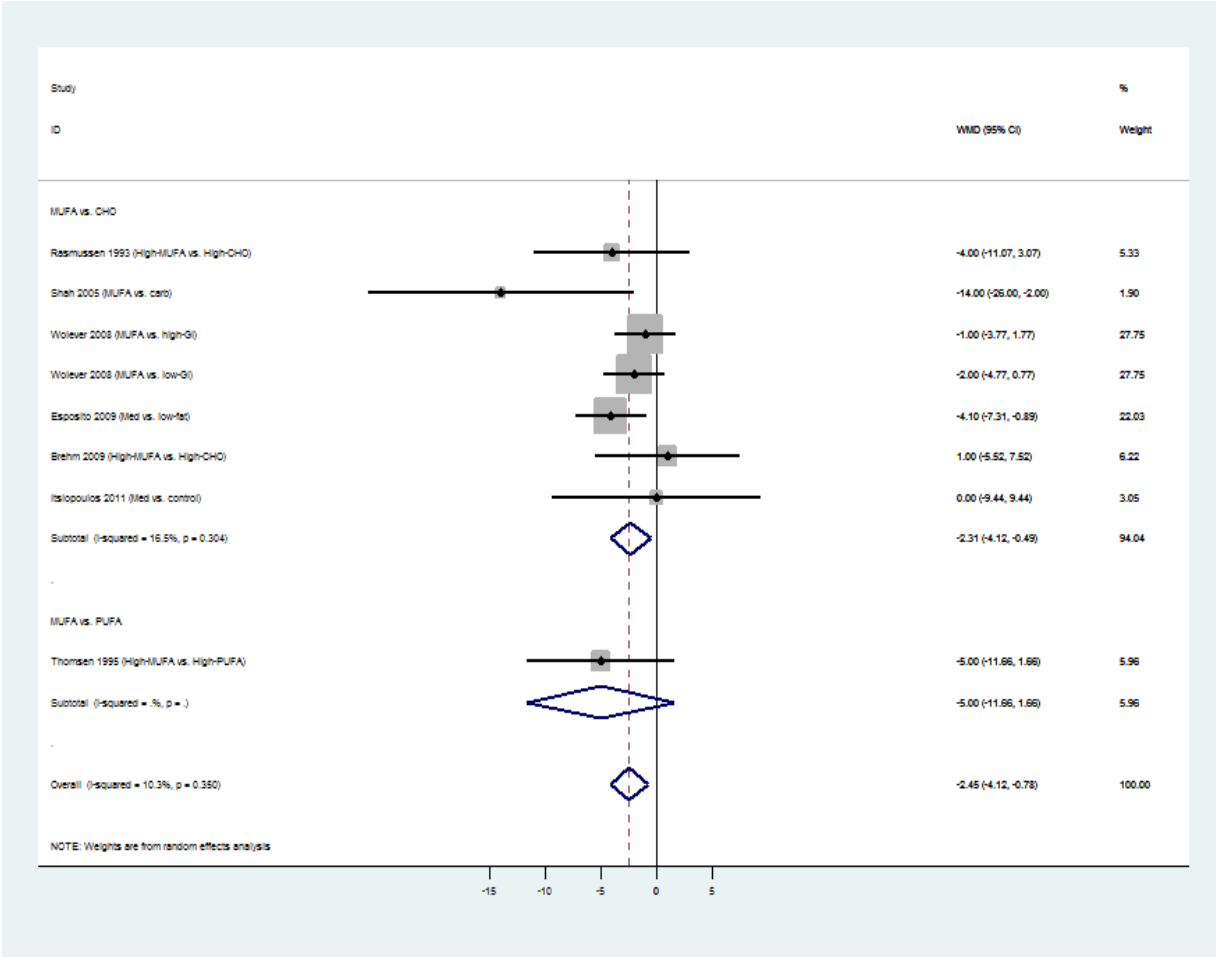

SUPPLEMENTARY DATA

LDL cholesterol (mmol/L)

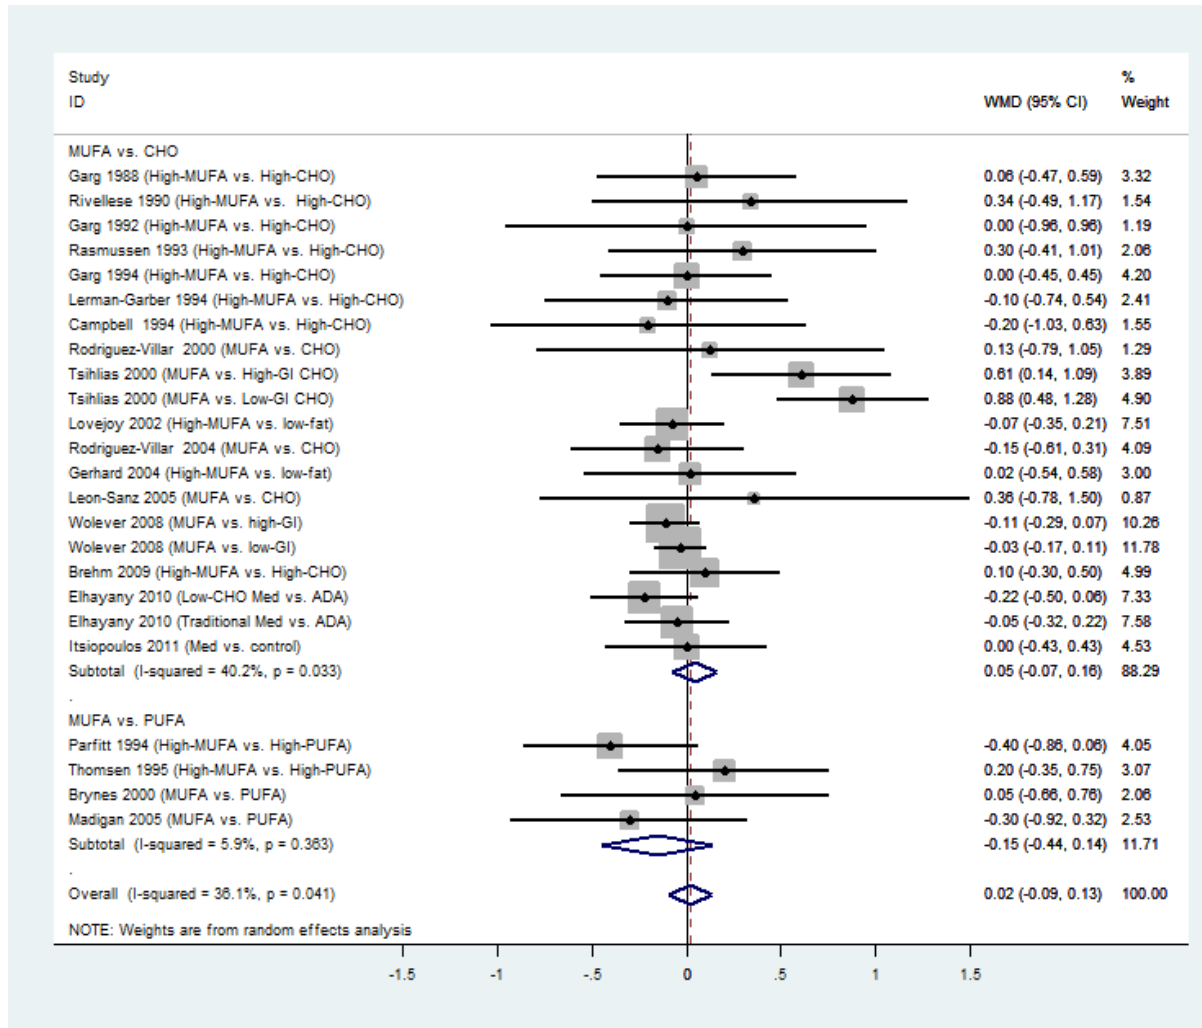

SUPPLEMENTARY DATA

Diastolic blood pressure (mmHg)

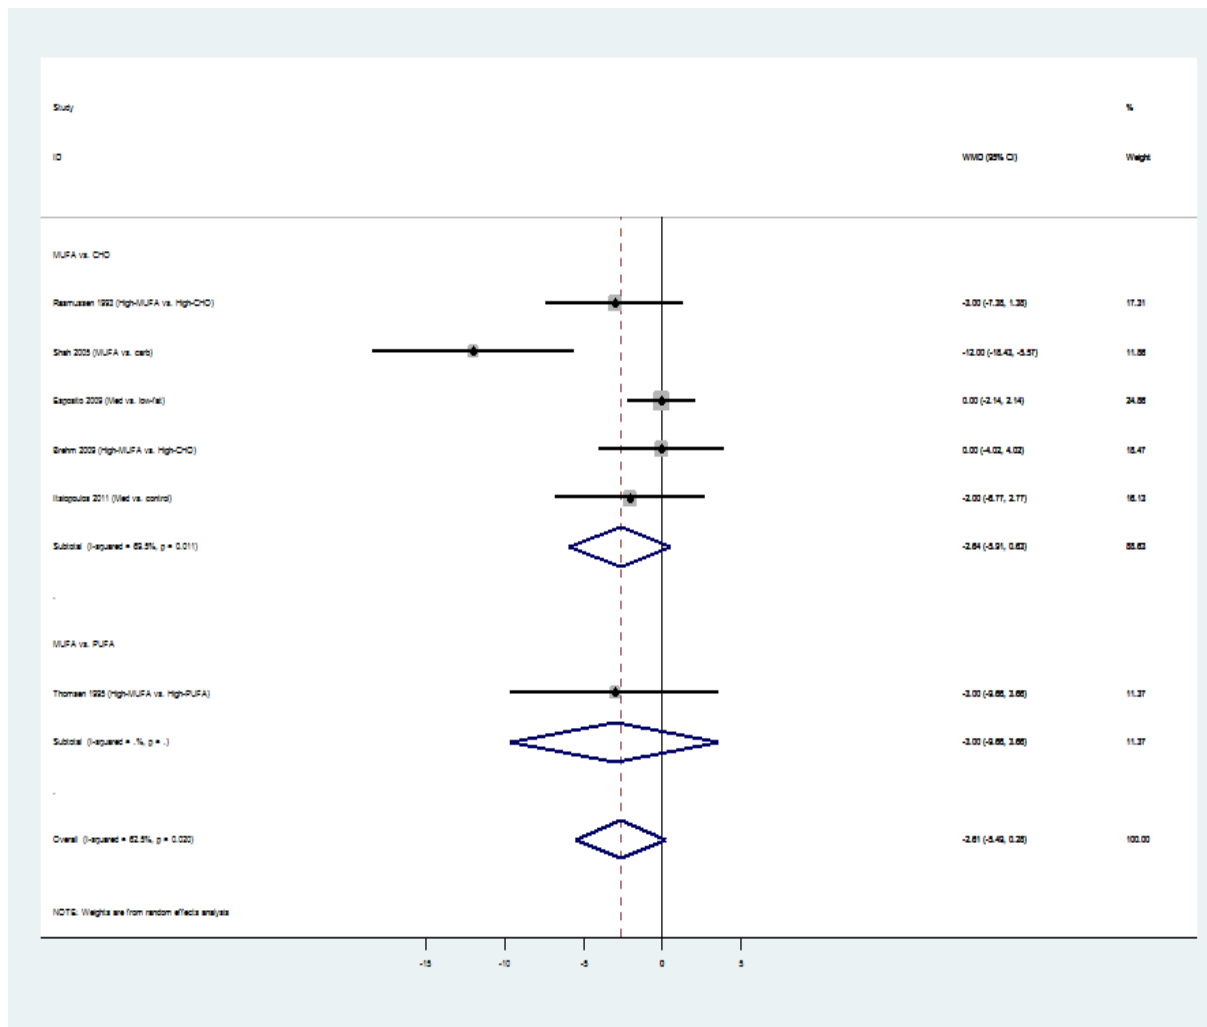

SUPPLEMENTARY DATA

HDL cholesterol (mmol/L)

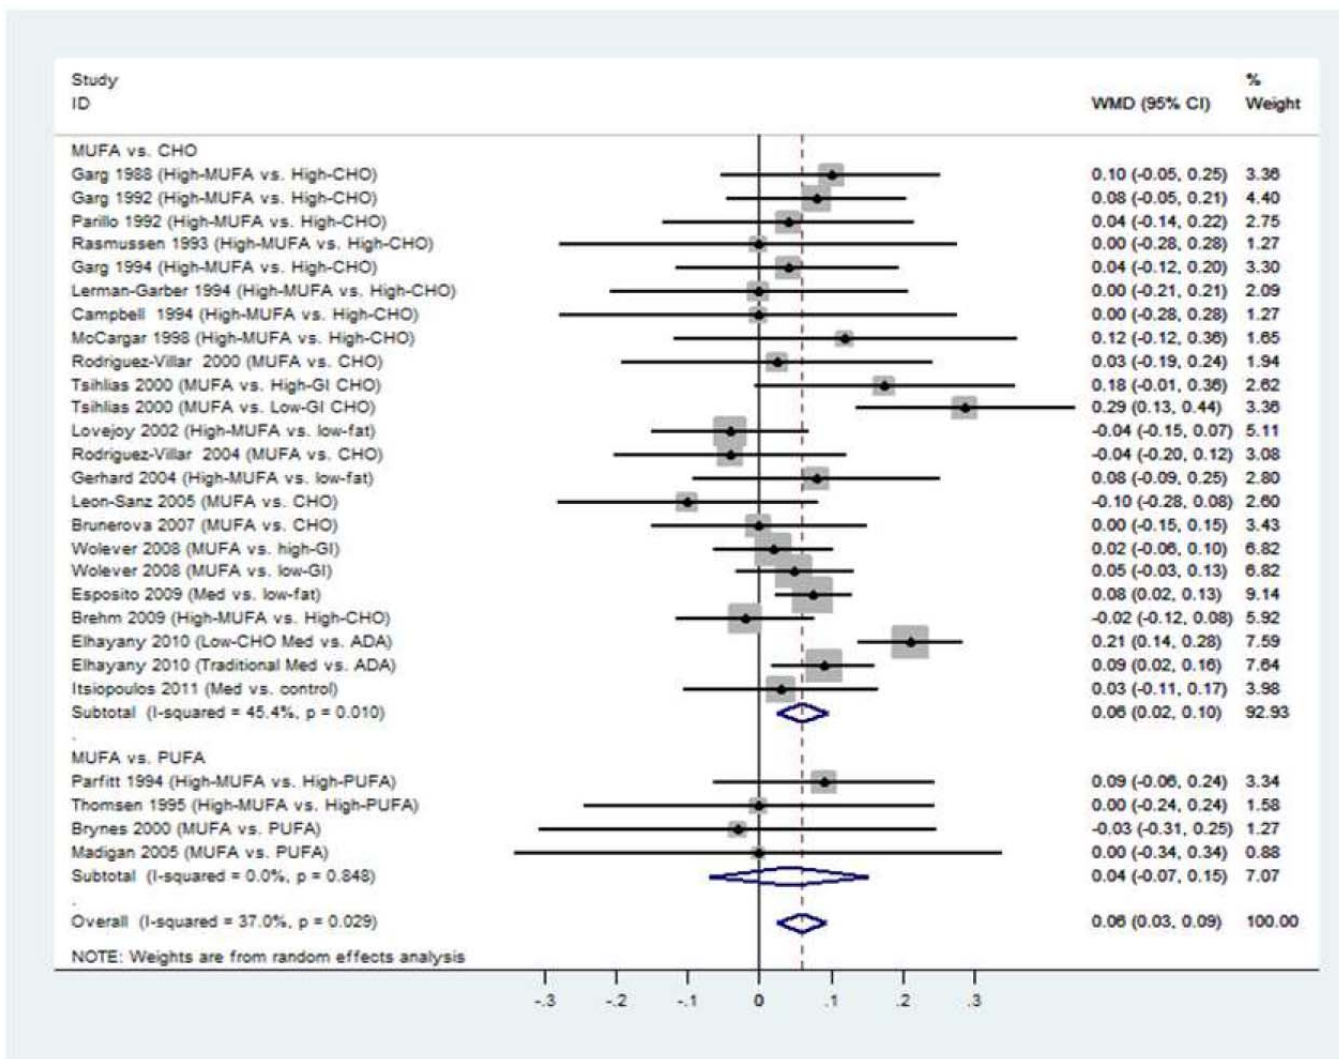

SUPPLEMENTARY DATA

Supplementary Figure 3. Funnel plots of main outcomes using random-effects model

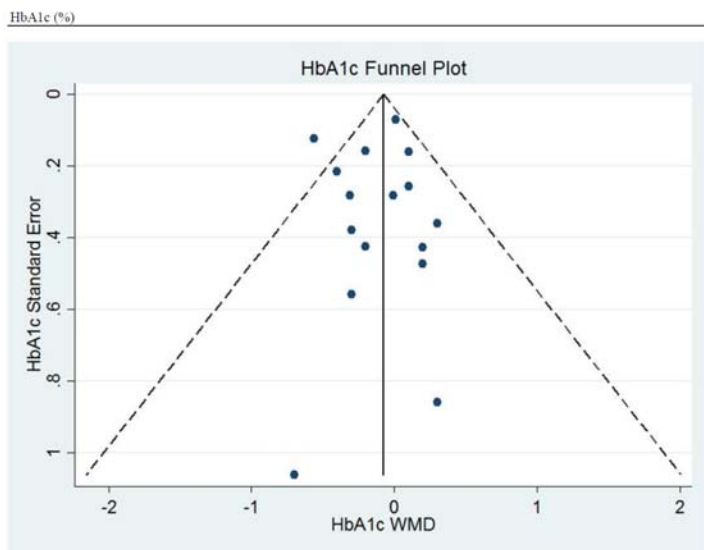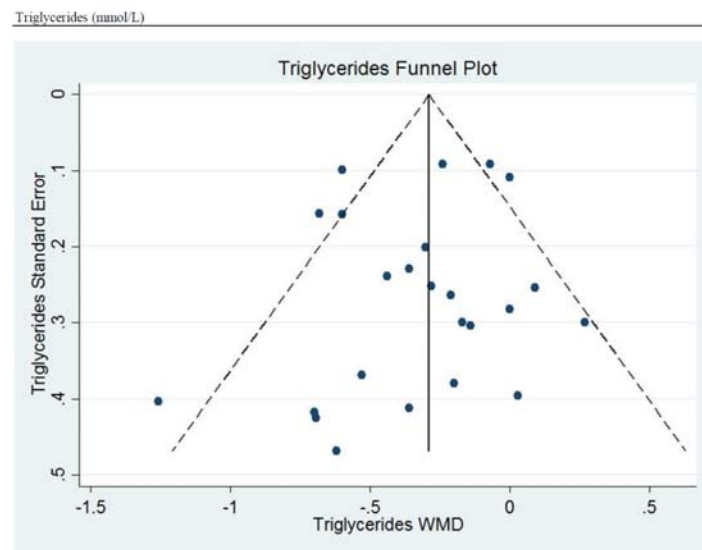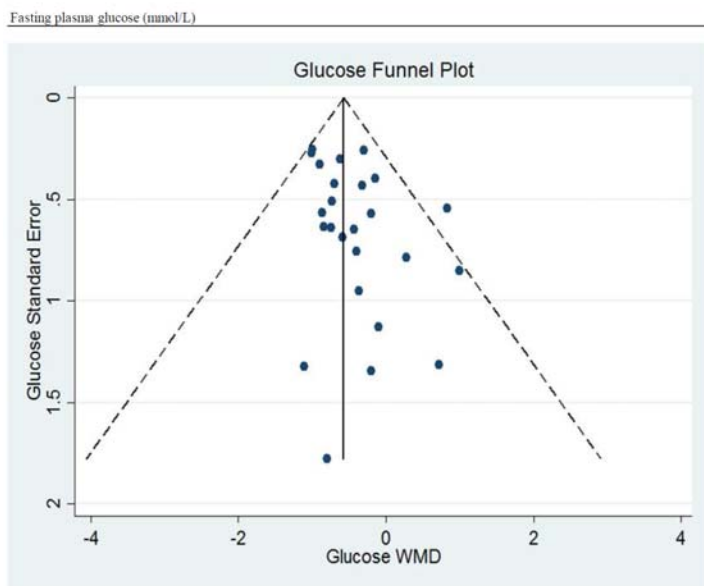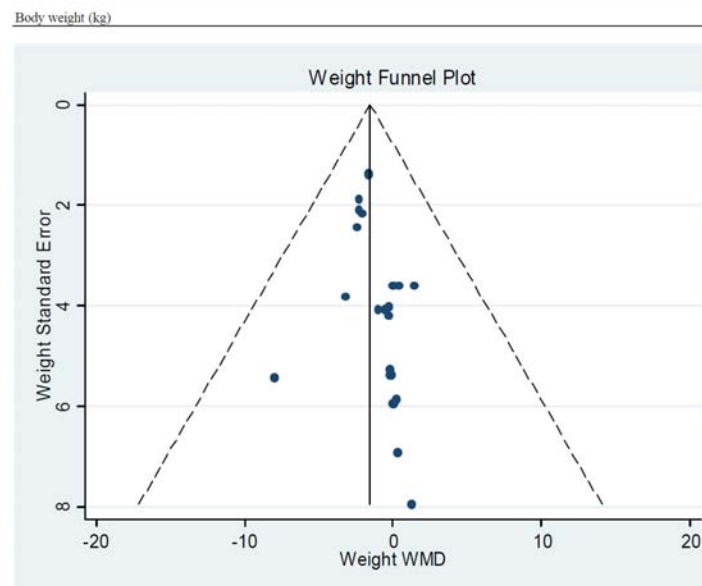

# SUPPLEMENTARY DATA

Fasting insulin (pmol/L)

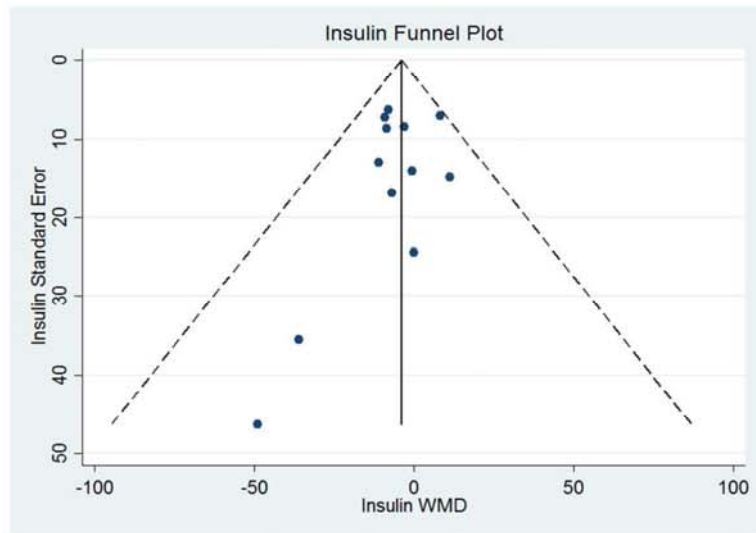

Systolic blood pressure (mmHg)

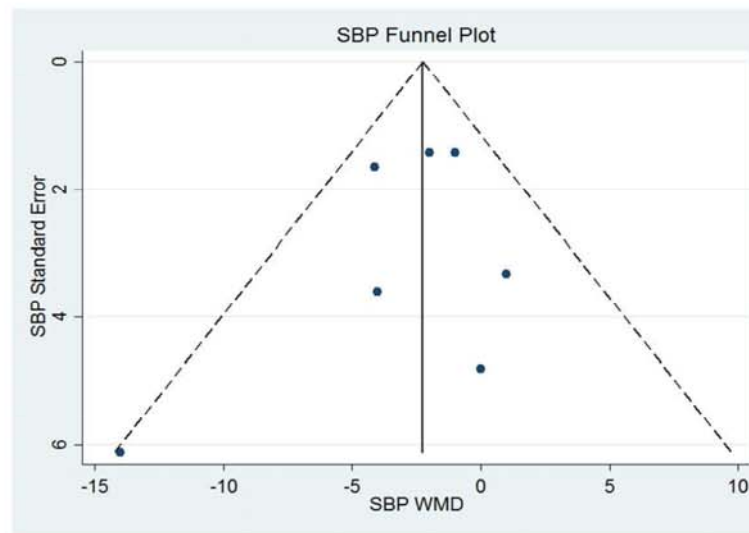

LDL cholesterol (mmol/L)

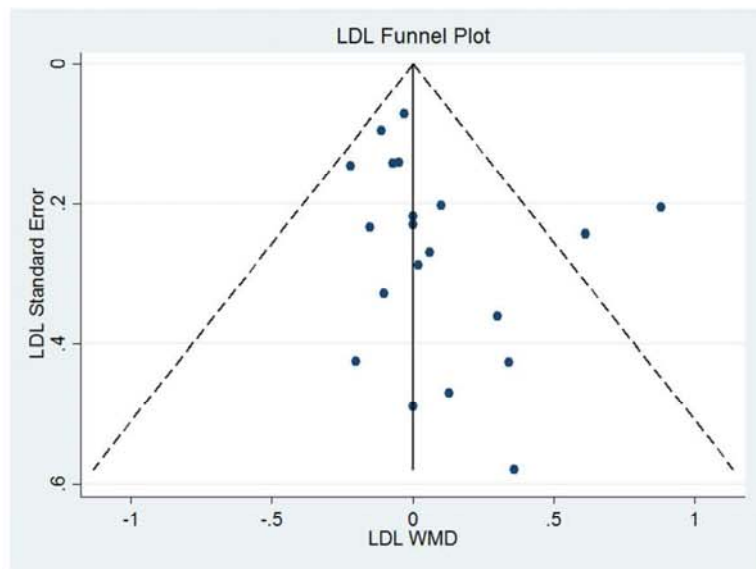

Diastolic blood pressure (mmHg)

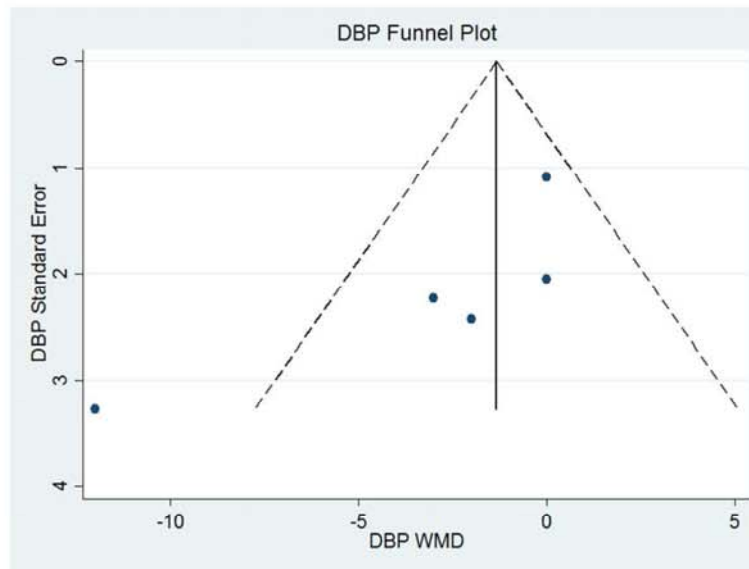

SUPPLEMENTARY DATA

HDL cholesterol (mmol/L)

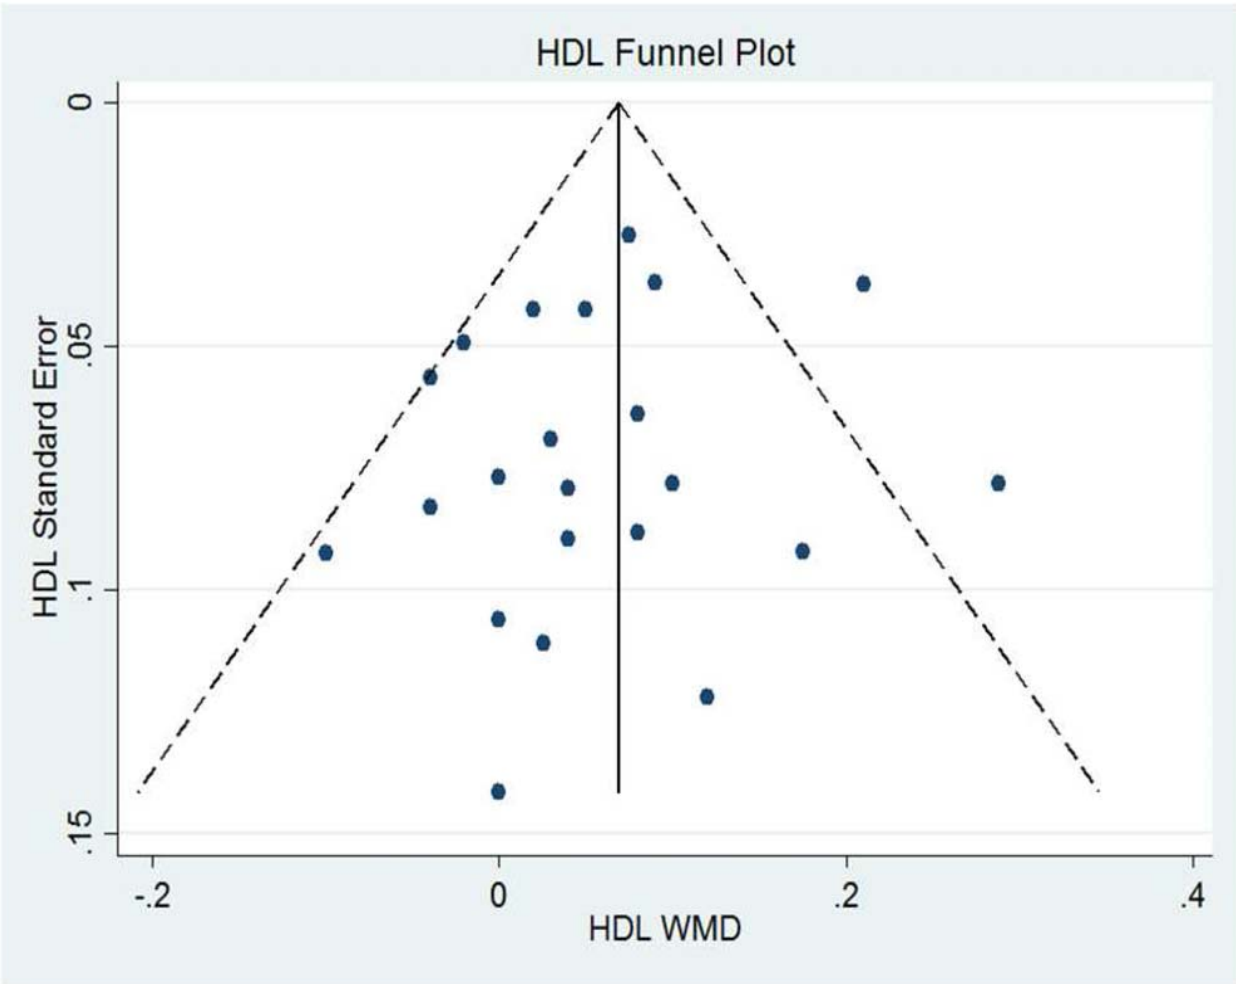

SUPPLEMENTARY DATA

Supplementary Table 3. Assessment of study quality

| Study citation                                                                                                                                                                                                                                                                                                                                                     | Database | Trial arms/Total sample size                                                          | Duration  | Random Sequence Generation | Allocation Concealment | Blinding of Participants and Personnel | Blinding of Outcome Assessment | Incomplete Outcome Data                                  | Selective Reporting | Other Bias |
|--------------------------------------------------------------------------------------------------------------------------------------------------------------------------------------------------------------------------------------------------------------------------------------------------------------------------------------------------------------------|----------|---------------------------------------------------------------------------------------|-----------|----------------------------|------------------------|----------------------------------------|--------------------------------|----------------------------------------------------------|---------------------|------------|
| <b>Monounsaturated fats</b>                                                                                                                                                                                                                                                                                                                                        |          |                                                                                       |           |                            |                        |                                        |                                |                                                          |                     |            |
| Lasa A, Miranda J, Bullo M, Casas R, Salas-Salvado J, Larretxi I, et al. Comparative effect of two Mediterranean diets versus a low-fat diet on glycaemic control in individuals with type 2 diabetes. <i>European journal of clinical nutrition</i> 2014;68(7):767-72                                                                                             | PubMed   | Control: Low-fat (67)<br>Intervention: Olive oil (74)<br>Total: 141                   | 1 year    | Low Risk                   | Unclear                | High Risk                              | Low Risk                       | Low Risk - no dropouts                                   | Low Risk            | Low Risk   |
| Lasa A, Miranda J, Bullo M, Casas R, Salas-Salvado J, Larretxi I, et al. Comparative effect of two Mediterranean diets versus a low-fat diet on glycaemic control in individuals with type 2 diabetes. <i>European journal of clinical nutrition</i> 2014;68(7):767-72                                                                                             | PubMed   | Control: Low-fat (67)<br>Intervention: Nuts (50)<br>Total: 117                        | 1 year    | Low Risk                   | Unclear                | High Risk                              | Low Risk                       | Low Risk - no dropouts                                   | Low Risk            | Low Risk   |
| Itsiopoulos C, Brazionis L, Kaimakamis M, Cameron M, Best JD, O'Dea K, et al. Can the Mediterranean diet lower HbA1c in type 2 diabetes? Results from a randomized cross-over study. <i>Nutrition, metabolism, and cardiovascular diseases : NMCD</i> 2011;21(9):740-7                                                                                             | PubMed   | Control: Control<br>Intervention: Mediterranean<br>Cross-over design<br>Total: 27     | 3 months  | Low Risk                   | Unclear                | High Risk                              | Low Risk                       | Low Risk - 4 subjects dropped out                        | Low Risk            | Low Risk   |
| Esposito K, Maiorino MI, Ciotola M, Di Palo C, Scognamiglio P, Gicchino M, et al. Effects of a Mediterranean-style diet on the need for antihyperglycemic drug therapy in patients with newly diagnosed type 2 diabetes: a randomized trial. <i>Annals of internal medicine</i> 2009;151(5):306-14                                                                 | PubMed   | Arm 1: Low-fat (107)<br>Arm 2: Mediterranean (108)<br>Total: 215                      | 4 years   | Low Risk                   | Low Risk               | High Risk                              | Low Risk                       | Low Risk - equal number dropped out (10 from each arm)   | Low Risk            | Low Risk   |
| Wolever TM, Mehling C, Chiasson JL, Josse RG, Leiter LA, Maheux P, et al. Low glycaemic index diet and disposition index in type 2 diabetes (the Canadian trial of carbohydrates in diabetes): a randomised controlled trial. <i>Diabetologia</i> 2008;51(9):1607-15                                                                                               | PubMed   | Arm 1: High-GI (41)<br>Arm 2: Low-GI (46)<br>Arm 3: Low CHO (MUFA) (48)<br>Total: 135 | 12 months | Low Risk                   | Unclear                | High Risk                              | Low Risk                       | Low Risk - Mean imputation                               | Low Risk            | Low Risk   |
| Wolever TM, Gibbs AL, Mehling C, Chiasson JL, Connelly PW, Josse RG, et al. The Canadian Trial of Carbohydrates in Diabetes (CCD), a 1-y controlled trial of low-glycemic-index dietary carbohydrate in type 2 diabetes: no effect on glycated hemoglobin but reduction in C-reactive protein. <i>The American journal of clinical nutrition</i> 2008;87(1):114-25 | PubMed   | Control: High-GI (48)<br>Intervention: Low CHO (MUFA) (53)<br>Total: 101              | 12 months | Low Risk                   | Low Risk               | High Risk                              | Low Risk                       | Low - Medium Risk (unclear if missingness is not random) | Low Risk            | Low Risk   |
| Wolever TM, Gibbs AL, Mehling C, Chiasson JL, Connelly PW, Josse RG, et al. The Canadian Trial of Carbohydrates in Diabetes (CCD), a 1-y controlled trial of low-glycemic-index dietary carbohydrate in type 2 diabetes: no effect on glycated hemoglobin but reduction in C-reactive protein. <i>The American journal of clinical nutrition</i> 2008;87(1):114-25 | PubMed   | Control: Low-GI (55)<br>Intervention: Low CHO (MUFA) (53)<br>Total: 108               | 12 months | Low Risk                   | Low Risk               | High Risk                              | Low Risk                       | Low - Medium Risk (unclear if missingness is not random) | Low Risk            | Low Risk   |



## SUPPLEMENTARY DATA

|                                                                                                                                                                                                                                                                                                                                                        |         |                                                                                                        |          |          |          |           |          |                                           |          |                                            |
|--------------------------------------------------------------------------------------------------------------------------------------------------------------------------------------------------------------------------------------------------------------------------------------------------------------------------------------------------------|---------|--------------------------------------------------------------------------------------------------------|----------|----------|----------|-----------|----------|-------------------------------------------|----------|--------------------------------------------|
| Shah M, Adams-Huet B, Bantle JP, Henry RR, Griver KA, Raatz SK, et al. Effect of a high-carbohydrate versus a high--cis-monounsaturated fat diet on blood pressure in patients with type 2 diabetes. <i>Diabetes care</i> 2005;28(11):2607-12                                                                                                          | PubMed  | Control: High-carb (13)<br>Intervention: High-MUFA (8)<br>Total: 21                                    | 14 weeks | Unclear  | Low Risk | High Risk | Low Risk | Unclear                                   | Low Risk | Low Risk                                   |
| Leon-Sanz M, Garcia-Luna PP, Sanz-Paris A, Gomez-Candela C, Casimiro C, Chamorro J, et al. Glycemic and lipid control in hospitalized type 2 diabetic patients: evaluation of 2 enteral nutrition formulas (low carbohydrate-high monounsaturated fat vs high carbohydrate). <i>JPEN. Journal of parenteral and enteral nutrition</i> 2005;29(1):21-9  | PubMed  | Control: Precitene (High-CHO) (53)<br>Intervention: Glucerna (High-MUFA) (51)<br>Total: 104            | 2 weeks  | Unclear  | Unclear  | High Risk | Unclear  | High Risk - significant loss to follow-up | Low Risk | Low Risk                                   |
| Rodriguez-Villar C, Perez-Heras A, Mercade I, Casals E, Ros E. Comparison of a high-carbohydrate and a high-monounsaturated fat, olive oil-rich diet on the susceptibility of LDL to oxidative modification in subjects with Type 2 diabetes mellitus. <i>Diabetic medicine : a journal of the British Diabetic Association</i> 2004;21(2):142-9       | PubMed  | Control: High-CHO<br>Intervention: High-MUFA<br>Cross-over design<br>Total: 22                         | 6 weeks  | Low Risk | Low Risk | High Risk | Low Risk | Low Risk                                  | Low Risk | Low Risk                                   |
| Lovejoy JC, Most MM, Lefevre M, Greenway FL, Rood JC. Effect of diets enriched in almonds on insulin action and serum lipids in adults with normal glucose tolerance or type 2 diabetes. <i>The American journal of clinical nutrition</i> 2002;76(5):1000-6                                                                                           | PubMed  | Control: High-fat with almonds<br>Intervention: Low-fat with almonds<br>Cross-over design<br>Total: 30 | 4 weeks  | Unclear  | Low Risk | High Risk | Low Risk | Low Risk - low drop out rate              | Low Risk | Low Risk                                   |
| Tsahlias EB, Gibbs AL, McBurney MI, Wolever TM. Comparison of high- and low-glycemic-index breakfast cereals with monounsaturated fat in the long-term dietary management of type 2 diabetes. <i>The American journal of clinical nutrition</i> 2000;72(2):439-49                                                                                      | PubMed  | Control: CHO-High GI (29)<br>Intervention: MUFA (32)<br>Total: 61                                      | 6 months | Low Risk | Unclear  | High Risk | Low Risk | Low Risk                                  | Low Risk | Low Risk                                   |
| Tsahlias EB, Gibbs AL, McBurney MI, Wolever TM. Comparison of high- and low-glycemic-index breakfast cereals with monounsaturated fat in the long-term dietary management of type 2 diabetes. <i>The American journal of clinical nutrition</i> 2000;72(2):439-49                                                                                      | PubMed  | Control: CHO-Low GI (30)<br>Intervention: MUFA (32)<br>Total: 62                                       | 6 months | Unclear  | Unclear  | High Risk | Low Risk | Low Risk                                  | Low Risk | Low Risk                                   |
| Brunerova L, Smejkalova V, Potockova J, Andel M. A comparison of the influence of a high-fat diet enriched in monounsaturated fatty acids and conventional diet on weight loss and metabolic parameters in obese non-diabetic and Type 2 diabetic patients. <i>Diabetic medicine : a journal of the British Diabetic Association</i> 2007;24(5):533-40 | MedLine | Control: CHO (13)<br>Intervention: MUFA (14)<br>Total: 27                                              | 3 months | Unclear  | Unclear  | High Risk | Low Risk | Low Risk                                  | Low Risk | High Risk - weight loss in treatment group |
| McCargar LJ, Innis SM, Bowron E, Leichter J, Dawson K, Toth E, et al. Effect of enteral nutritional products differing in carbohydrate and fat on indices of carbohydrate and lipid metabolism in patients with NIDDM. <i>Molecular and cellular biochemistry</i> 1998;188(1-2):81-9                                                                   | MedLine | Control: High-CHO (16)<br>Intervention: High-MUFA (16)<br>Total: 32                                    | 4 weeks  | Unclear  | Unclear  | High Risk | Low Risk | Low Risk                                  | Low Risk | High Risk - weight loss in both groups     |

## SUPPLEMENTARY DATA

|                                                                                                                                                                                                                                                                                                                                  |            |                                                                                 |           |          |          |           |          |                                                                         |          |                                                      |
|----------------------------------------------------------------------------------------------------------------------------------------------------------------------------------------------------------------------------------------------------------------------------------------------------------------------------------|------------|---------------------------------------------------------------------------------|-----------|----------|----------|-----------|----------|-------------------------------------------------------------------------|----------|------------------------------------------------------|
| Garg A, Bantle JP, Henry RR, Coulston AM, Griver KA, Raatz SK, et al. Effects of varying carbohydrate content of diet in patients with non-insulin-dependent diabetes mellitus. <i>Jama</i> 1994;271(18):1421-8                                                                                                                  | MedLine    | Control: High-CHO (22)<br>Intervention: High-MUFA (20)<br>Total: 42             | 6 weeks   | Low Risk | Low Risk | High Risk | Low Risk | Low Risk                                                                | Low Risk | Low Risk                                             |
| Lerman-Garber I, Ichazo-Cerro S, Zamora-Gonzalez J, Cardoso-Saldana G, Posadas-Romero C. Effect of a high-monounsaturated fat diet enriched with avocado in NIDDM patients. <i>Diabetes care</i> 1994;17(4):311-5                                                                                                                | MedLine    | Control: High-CHO<br>Intervention: MUFA<br>Cross-over design<br>Total: 12       | 4 weeks   | Unclear  | Unclear  | High Risk | Low Risk | Low Risk                                                                | Low Risk | Low Risk                                             |
| Brehm BJ, Lattin BL, Sumner SS, Boback JA, Gilchrist GM, Jandacek RJ, et al. One-year comparison of a high-monounsaturated fat diet with a high-carbohydrate diet in type 2 diabetes. <i>Diabetes care</i> 2009;32(2):215-20                                                                                                     | Additional | Control: High-CHO (52)<br>Intervention: High-MUFA (43)<br>Total: 95             | 12 months | Unclear  | Unclear  | High Risk | Low Risk | High Risk - significant loss to follow-up, seems to be mostly at random | Low Risk | Weight loss in both arms of the trial                |
| Gerhard GT, Ahmann A, Meeuws K, McMurry MP, Duell PB, Connor WE. Effects of a low-fat diet compared with those of a high-monounsaturated fat diet on body weight, plasma lipids and lipoproteins, and glycemic control in type 2 diabetes. <i>The American journal of clinical nutrition</i> 2004;80(3):668-73                   | Additional | Control: Low-fat<br>Intervention: High-MUFA<br>Cross-over design<br>Total: 11   | 6 weeks   | Unclear  | Unclear  | High Risk | Low Risk | Low Risk                                                                | Low Risk | Wight loss in one arm of the trial Small sample size |
| Gumbiner B, Low CC, Reaven PD. Effects of a monounsaturated fatty acid-enriched hypocaloric diet on cardiovascular risk factors in obese patients with type 2 diabetes. <i>Diabetes care</i> 1998;21(1):9-15                                                                                                                     | Additional | Control: CHO (8)<br>Intervention: MUFA (9)<br>Total: 17                         | 6 weeks   | Unclear  | Unclear  | High Risk | Low Risk | Low Risk                                                                | Low Risk | Small sample size                                    |
| Elhayany A, Lustman A, Abel R, Attal-Singer J, Vinker S. A low carbohydrate Mediterranean diet improves cardiovascular risk factors and diabetes control among overweight patients with type 2 diabetes mellitus: a 1-year prospective randomized intervention study. <i>Diabetes, obesity &amp; metabolism</i> 2010;12(3):204-9 | Additional | Control: ADA (55)<br>Intervention: Low-CHO Mediterranean (61)<br>Total: 116     | 12 months | Low Risk | Unclear  | High Risk | Low Risk | Low Risk                                                                | Low Risk | Low Risk                                             |
| Elhayany A, Lustman A, Abel R, Attal-Singer J, Vinker S. A low carbohydrate Mediterranean diet improves cardiovascular risk factors and diabetes control among overweight patients with type 2 diabetes mellitus: a 1-year prospective randomized intervention study. <i>Diabetes, obesity &amp; metabolism</i> 2010;12(3):204-9 | Additional | Control: ADA (55)<br>Intervention: Traditional Mediterranean (63)<br>Total: 118 | 12 months | Low Risk | Low Risk | High Risk | Low Risk | High Risk - loss to follow-up                                           | Low Risk | Low Risk                                             |
| Garg A, Bonanome A, Grundy SM, Zhang ZJ, Unger RH. Comparison of a high-carbohydrate diet with a high-monounsaturated-fat diet in patients with non-insulin-dependent diabetes mellitus. <i>The New England journal of medicine</i> 1988;319(13):829-34                                                                          | Additional | Control: High-CHO<br>Intervention: High-MUFA<br>Cross-over design<br>Total: 10  | 4 weeks   | Unclear  | Unclear  | High Risk | Low Risk | Low Risk                                                                | Low Risk | Low Risk                                             |
| Rivellese AA, Giacco R, Genovese S, Patti L, Marotta G, Pacioni D, et al. Effects of changing amount of carbohydrate in diet on plasma lipoproteins and apolipoproteins in type II diabetic patients. <i>Diabetes care</i> 1990;13(4):446-8                                                                                      | Additional | Control: High-CHO<br>Intervention: High-MUFA<br>Cross-over design<br>Total: 8   | 15 days   | Unclear  | Unclear  | High Risk | Low Risk | Low Risk                                                                | Low Risk | Small sample size                                    |

## SUPPLEMENTARY DATA

|                                                                                                                                                                                                                                                                                                                                                                        |            |                                                                                     |         |          |         |           |          |                                                                                             |          |                   |
|------------------------------------------------------------------------------------------------------------------------------------------------------------------------------------------------------------------------------------------------------------------------------------------------------------------------------------------------------------------------|------------|-------------------------------------------------------------------------------------|---------|----------|---------|-----------|----------|---------------------------------------------------------------------------------------------|----------|-------------------|
| Garg A, Grundy SM, Unger RH. Comparison of effects of high and low carbohydrate diets on plasma lipoproteins and insulin sensitivity in patients with mild NIDDM. <i>Diabetes</i> 1992;41(10):1278-85                                                                                                                                                                  | Additional | Control: High-CHO<br>Intervention: High-MUFA<br>Cross-over design<br>Total: 8       | 3 weeks | Unclear  | Unclear | High Risk | Low Risk | Low Risk                                                                                    | Low Risk | Small sample size |
| Parillo M, Rivellese AA, Ciardullo AV, Capaldo B, Giacco A, Genovese S, et al. A high-monounsaturated-fat/low-carbohydrate diet improves peripheral insulin sensitivity in non-insulin-dependent diabetic patients. <i>Metabolism: clinical and experimental</i> 1992;41(12):1373-8                                                                                    | Additional | Control: High-CHO<br>Intervention: High-MUFA<br>Cross-over design<br>Total: 10      | 15 days | Low Risk | Unclear | High Risk | Low Risk | Low Risk                                                                                    | Low Risk | Small sample size |
| Rasmussen OW, Thomsen C, Hansen KW, Vesterlund M, Winther E, Hermansen K. Effects on blood pressure, glucose, and lipid levels of a high-monounsaturated fat diet compared with a high-carbohydrate diet in NIDDM subjects. <i>Diabetes care</i> 1993;16(12):1565-71                                                                                                   | Additional | Control: High-CHO<br>Intervention: High-MUFA<br>Cross-over design<br>Total: 15      | 3 weeks | Low Risk | Unclear | High Risk | Low Risk | Low Risk                                                                                    | Low Risk | Small sample size |
| Campbell LV, Marmot PE, Dyer JA, Borkman M, Storlien LH. The high-monounsaturated fat diet as a practical alternative for NIDDM. <i>Diabetes care</i> 1994;17(3):177-82                                                                                                                                                                                                | Additional | Control: High-CHO<br>Intervention: High-MUFA<br>Cross-over design<br>Total: 10      | 2 weeks | Low Risk | Unclear | High Risk | Low Risk | Low Risk                                                                                    | Low Risk | Small sample size |
| <u>Polyunsaturated fats</u>                                                                                                                                                                                                                                                                                                                                            |            |                                                                                     |         |          |         |           |          |                                                                                             |          |                   |
| Madigan C, Ryan M, Owens D, Collins P, Tomkin GH. Comparison of diets high in monounsaturated versus polyunsaturated fatty acid on postprandial lipoproteins in diabetes. <i>Irish journal of medical science</i> 2005;174(1):8-20                                                                                                                                     | Additional | Control: Linoleic acid<br>Intervention: Oleic acid<br>Cross-over design<br>Total: 6 | 2 weeks | Low Risk | Unclear | High Risk | Low Risk | Low Risk                                                                                    | Low Risk | Small sample size |
| Thomsen C, Rasmussen OW, Hansen KW, Vesterlund M, Hermansen K. Comparison of the effects on the diurnal blood pressure, glucose, and lipid levels of a diet rich in monounsaturated fatty acids with a diet rich in polyunsaturated fatty acids in type 2 diabetic subjects. <i>Diabetic medicine : a journal of the British Diabetic Association</i> 1995;12(7):600-6 | Additional | Control: High-PUFA<br>Intervention: High-MUFA<br>Cross-over design<br>Total: 16     | 3 weeks | Low Risk | Unclear | High Risk | Low Risk | Low Risk                                                                                    | Low Risk | Small sample size |
| Brynes AE, Edwards CM, Jadhav A, Ghatei MA, Bloom SR, Frost GS. Diet-induced change in fatty acid composition of plasma triacylglycerols is not associated with change in glucagon-like peptide 1 or insulin sensitivity in people with type 2 diabetes. <i>The American journal of clinical nutrition</i> 2000;72(5):1111-8                                           | PubMed     | Control: PUFA<br>Intervention: MUFA<br>Cross-over design<br>Total: 9                | 24 days | Low Risk | Unclear | High Risk | Low Risk | Low Risk                                                                                    | Low Risk | Small sample size |
| Parfitt VJ, Desomeaux K, Bolton CH, Hartog M. Effects of high monounsaturated and polyunsaturated fat diets on plasma lipoproteins and lipid peroxidation in type 2 diabetes mellitus. <i>Diabetic medicine : a journal of the British Diabetic Association</i> 1994;11(1):85-91                                                                                       | MedLine    | Control: High-PUFA<br>Intervention: High-MUFA<br>Cross-over design<br>Total: 13     | 6 weeks | Unclear  | Unclear | High Risk | Low Risk | High Risk, two individuals did not complete the cross-over design.<br>Rebalanced with ANOVA | Low Risk | Small sample size |

SUPPLEMENTARY DATA

Supplementary Table 4. Baseline and outcome results for participants at the end of follow-up

| Citation                                    | Intervention sample size | Control sample size | Duration  | Age intervention | Age control | BMI interventio n | BMI control | Diabetes duratio n | Diff MUFA   | Time        | HbA1c intervent ion mean | HbA1c intervent ion sd | HbA1c control mean |
|---------------------------------------------|--------------------------|---------------------|-----------|------------------|-------------|-------------------|-------------|--------------------|-------------|-------------|--------------------------|------------------------|--------------------|
| Lasa 2014 (Olive oil vs. low fat)           | 74                       | 67                  | 1 year    | 67.4             | 67.2        | 29.4              | 29.8        |                    | 2.461817182 | 52          |                          |                        |                    |
| Lasa 2014 (Nuts vs. low fat)                | 50                       | 67                  | 1 year    | 67.1             | 67.2        | 30.1              | 29.8        |                    | 1.667633455 | 52          |                          |                        |                    |
| Itsiopoulos 2011 (Med vs. control)          | 27                       | 27                  | 3 months  |                  |             |                   |             | 6                  | 10.2        | 12          | 6.8                      | 1.263655745            | 7.1                |
| Esposito 2009 (Med vs. low-fat)             | 108                      | 107                 | 1 year    | 52.4             | 51.9        | 29.7              | 29.5        | 0                  | 6           | 52          | 6.55                     | 0.9                    | 7.11               |
| Wolever 2008 (MUFA vs. high-GI)             | 53                       | 48                  | 12 months | 58.6             | 60.4        | 31.1              | 30.1        |                    | 6           | 48          | 6.35                     | 0.364005494            | 6.34               |
| Wolever 2008 (MUFA vs. low-GI)              | 53                       | 55                  | 12 months | 58.6             | 60.6        | 31.1              | 31.6        |                    | 7.6         | 48          | 6.35                     | 0.364005494            | 6.34               |
| Shah 2005 (MUFA vs. carb)                   | 8                        | 13                  | 14 weeks  | 58               | 58          | 28.1              | 28.1        |                    | 15          | 14          |                          |                        |                    |
| Leon-Sanz 2005 (MUFA vs. CHO)               | 36                       | 27                  | 2 weeks   | 73.9             | 70.6        | 25.5              | 26.5        |                    | 25.47       | 2           |                          |                        |                    |
| Rodriguez-Villar 2004 (MUFA vs. CHO)        | 22                       | 22                  | 6 weeks   | 61               | 61          | 28.3              | 28.3        | 5.3                | 11.3        | 6           | 6.6                      | 0.9                    | 6.5                |
| Rodriguez-Villar 2000 (MUFA vs. CHO)        | 12                       | 12                  | 6 weeks   |                  |             | 27.9              | 27.9        | 6                  | 13.2        | 6           | 6.7                      | 1.3                    | 6.5                |
| Lovejoy 2002 (High-MUFA vs. low-fat)        | 30                       | 30                  | 4 weeks   | 53.8             | 53.8        | 33                | 33          |                    | 7           | 4           | 7                        | 1.643167673            | 7.2                |
| Tsahuridu 2000 (MUFA vs. High-GI CHO)       | 32                       | 29                  | 6 months  | 63               | 62.9        | 27.8              | 28          |                    | 6.2         | 24          | 7.9832                   | 1.13137085             | 8.292              |
| Tsahuridu 2000 (MUFA vs. Low-GI CHO)        | 32                       | 30                  | 6 months  | 63               | 61.8        | 27.8              | 27.7        |                    | 6.8         | 24          | 7.9832                   | 1.13137085             | 7.992              |
| Brunerova 2007 (MUFA vs. CHO)               | 14                       | 13                  | 3 months  | 54.7             | 51.2        | 33.4              | 34.7        |                    | 12.5        | 12          | 6.6                      | 0.3                    | 6.5                |
| McCargar 1998 (High-MUFA vs. High-CHO)      | 16                       | 16                  | 4 weeks   | 55               | 59          | 28.4              | 28.7        | 4.45               |             | 4           |                          |                        |                    |
| Garg 1994 (High-MUFA vs. High-CHO)          | 20                       | 22                  | 6 weeks   | 58               | 58          | 28.1              | 28.1        |                    | 15          | 6           | 7.9                      | 1.5                    | 8.2                |
| Lerman-Garber 1994 (High-MUFA vs. High-CHO) | 12                       | 12                  | 4 weeks   | 56               | 56          | 28                | 28          |                    | 17.4        | 4           |                          |                        |                    |
| Brehm 2009 (High-MUFA vs. High-CHO)         | 43                       | 52                  | 12 months | 56.5             | 56.5        | 35.9              | 35.9        |                    |             | 48          | 7.5                      | 1.967231557            | 7.2                |
| Gerhard 2004 (High-MUFA vs. low-fat)        | 11                       | 11                  | 6 weeks   | 50.4             | 50.4        | 37.2              | 37.2        |                    | 16.8        | 6           | 6.9                      | 1.1                    | 6.7                |
| Gumbiner 1998 (MUFA vs. CHO)                | 9                        | 8                   | 6 weeks   | 55               | 51          | 36.3              | 37.2        | 7.435294118        | 48          | 6           |                          |                        |                    |
| Elhayany 2010 (Low-CHO Med vs. ADA)         | 61                       | 55                  | 12 months | 55.5             | 56          | 31.4              | 31.8        | 5.310344828        |             | 48          | 6.3                      | 1.4                    | 6.7                |
| Elhayany 2010 (Traditional Med vs. ADA)     | 63                       | 55                  | 12 months | 57.4             | 56          | 31.1              | 31.8        | 5.687288136        |             | 48          | 6.5                      | 0.8                    | 6.7                |
| Garg 1988 (High-MUFA vs. High-CHO)          | 10                       | 10                  | 4 weeks   | 56               | 56          | 29                | 29          |                    | 24          | 4           | 8.1                      | 1.58113883             | 7.8                |
| Rivellese 1990 (High-MUFA vs. High-CHO)     | 8                        | 8                   | 15 days   | 45               | 45          | 22                | 22          | 5                  |             | 2.142857143 |                          |                        |                    |
| Garg 1992 (High-MUFA vs. High-CHO)          | 8                        | 8                   | 3 weeks   | 63               | 63          | 30                | 30          |                    | 20          | 3           | 7.1                      | 1.979898987            | 7.8                |
| Parillo 1992 (High-MUFA vs. High-CHO)       | 10                       | 10                  | 15 days   | 52.7             | 52.7        | 26.7              | 26.7        | 8.4                | 16          | 2.142857143 |                          |                        |                    |
| Rasmussen 1993 (High-MUFA vs. High-CHO)     | 15                       | 15                  | 3 weeks   | 57               | 57          | 27                | 27          | 6                  | 19          | 3           |                          |                        |                    |
| Campbell 1994 (High-MUFA vs. High-CHO)      | 10                       | 10                  | 2 weeks   | 55               | 55          | 26.5              | 26.5        | 4.6                | 14          | 2           |                          |                        |                    |
| Madigan 2005 (MUFA vs. PUFA)                | 6                        | 6                   | 2 weeks   | 56               | 56          | 28                | 28          |                    |             | 2           |                          |                        |                    |
| Thomsen 1995 (High-MUFA vs. High-PUFA)      | 16                       | 16                  | 3 weeks   | 59               | 59          | 28                | 28          | 6                  | 20          | 3           |                          |                        |                    |
| Brynes 2000 (MUFA vs. PUFA)                 | 9                        | 9                   | 24 days   | 56               | 56          | 29.8              | 29.8        | 3                  | 8.6         | 3.428571429 | 6.5                      | 0.9                    | 6.6                |
| Parfitt 1994 (High-MUFA vs. High-PUFA)      | 13                       | 13                  | 6 weeks   | 58               | 59          | 28.4              | 28.4        | 4.2                | 13.06298451 | 6           |                          |                        |                    |

SUPPLEMENTARY DATA

| HbA1c_control_ | Glucose_interven | Glucose_interven | Glucose_control | Glucose_control | Insulin_interven | Insulin_interven | Insulin_control_ | Insulin_control_ | LDL_interven | LDL_interven | LDL_control_m | HDL_interven | HDL_interven |             |
|----------------|------------------|------------------|-----------------|-----------------|------------------|------------------|------------------|------------------|--------------|--------------|---------------|--------------|--------------|-------------|
| sd             | n                | n                | mean            | sd              | mean             | sd               | mean             | sd               | n            | n            | ean           | sd           | n            | sd          |
|                | 8.394444444      | 2.755555556      | 8.177777778     | 1.894444444     |                  |                  |                  |                  |              |              |               |              |              |             |
|                | 8.244444444      | 2.572222222      | 8.177777778     | 1.894444444     |                  |                  |                  |                  |              |              |               |              |              |             |
| 1.516386894    | 8.9              | 2.780042639      | 9.3             | 2.780042639     | 90.3             | 52.56807898      | 97.2             | 70.25925941      | 3            | 1.010924596  | 3             | 0.505462298  | 1.07         | 0.278004264 |
|                | 0.9              | 6.7              | 1.9             | 7.7             | 1.8              | 94               | 43               | 102.1            | 50           |              |               |              | 1.2          | 0.2         |
| 0.346410162    |                  |                  |                 |                 |                  |                  |                  |                  | 2.89         | 0.364005494  | 3             | 0.554256258  | 1.21         | 0.218403297 |
| 0.370809924    |                  |                  |                 |                 |                  |                  |                  |                  | 2.89         | 0.364005494  | 2.92          | 0.370809924  | 1.21         | 0.218403297 |
|                | 11.22            | 5.142503865      | 12.33           | 8.072905513     |                  |                  |                  |                  | 2.87         | 2.483610361  | 2.51          | 3.371195082  | 0.83         | 0.358884328 |
| 0.8            | 9.3              | 3.2              | 8.3             | 2.4             | 93.06            | 61.116           | 81.95            | 32.6415          | 3.27         | 0.64         | 3.42          | 0.89         | 1.28         | 0.28        |
| 1              | 9.83333          | 3.22222          | 9.11111         | 3.22222         |                  |                  |                  |                  | 4.1376       | 1.13784      | 4.0083        | 1.1637       | 1.24128      | 0.2586      |
| 1.643167673    | 8.14             | 2.683840532      | 8.73            | 2.629068276     | 88.2             | 55.86770087      | 88.8             | 52.58136552      | 2.51         | 0.547722558  | 2.58          | 0.547722558  | 1.13         | 0.219089023 |
| 1.077032961    | 8.335514         | 2.2627417        | 9.080374        | 2.692582404     |                  |                  |                  |                  | 3.7421782    | 0.848528137  | 3.1307206     | 1.023181313  | 1.21348      | 0.339411255 |
| 1.095445115    | 8.335514         | 2.2627417        | 9.2             | 2.19089023      |                  |                  |                  |                  | 3.7421782    | 0.848528137  | 2.8630197     | 0.766811581  | 1.21348      | 0.339411255 |
|                | 0.5              | 6.7              | 0.5             | 7               | 0.8              |                  |                  |                  |              |              |               |              | 1.4          | 0.2         |
|                | 7.54             | 1.48             | 7.97            | 2.12            | 129              | 44               | 178              | 180              |              |              |               |              | 1.2          | 0.4         |
| 2.1            | 8.1              | 1.8              | 8.3             | 1.9             | 144              | 79               | 144              | 79               | 3.36         | 0.78         | 3.36          | 0.7          | 0.96         | 0.27        |
|                | 5.43             | 1.11             | 6.16            | 1.38            |                  |                  |                  |                  | 3.38         | 0.72         | 3.48          | 0.88         | 0.98         | 0.26        |
| 1.44222051     | 7.89             | 2.950847336      | 7.06            | 2.203424495     | 251              | 154.7555492      | 287              | 192.5364381      | 2.61         | 1.034435927  | 2.51          | 0.913718804  | 1.22         | 0.220461083 |
| 0.9            | 7.78             | 2.16667          | 7.5             | 1.44444         |                  |                  |                  |                  | 2.53         | 0.6465       | 2.51          | 0.69822      | 1.09         | 0.20688     |
|                | 8                | 3.3              | 8.8             | 3.959797975     | 71               | 15               | 82               | 33.9411255       |              |              |               |              |              |             |
| 0.9            | 6.18             | 0.84             | 7.19            | 1.85            | 103.48           | 39.5865          | 95.15            | 36.8085          | 2.46         | 0.72         | 2.68          | 0.83         | 1.21         | 0.21        |
| 0.9            | 6.57             | 1.34             | 7.19            | 1.85            | 86.12            | 43.059           | 95.15            | 36.8085          | 2.63         | 0.67         | 2.68          | 0.83         | 1.09         | 0.21        |
| 2.213594362    | 5.6              | 0.537587202      | 6.49            | 0.885437745     |                  |                  |                  |                  | 3.45         | 0.600832755  | 3.39          | 0.600832755  | 0.88         | 0.158113883 |
|                | 9.66             | 1.21             | 10.5            | 1.33            |                  |                  |                  |                  | 3.44         | 0.88         | 3.1           | 0.82         |              |             |
| 2.2627417      | 7.6              | 2.2627417        | 7.7             | 2.2627417       |                  |                  |                  |                  | 3.01         | 0.90509668   | 3.01          | 1.046518036  | 0.76         | 0.141421356 |
|                | 6.38             | 1.97             | 6.74            | 2.28            | 43.2             | 14.4             | 51.6             | 23.4             |              |              |               |              | 0.99         | 0.2         |
|                | 6.1              | 1.161895004      | 6.8             | 1.161895004     |                  |                  |                  |                  | 3.8          | 1.161895004  | 3.5           | 0.774596669  | 1.2          | 0.387298335 |
|                | 8.5              | 2.846049894      | 8.7             | 3.16227766      | 35               | 18.97366596      | 38               | 18.97366596      | 3            | 0.948683298  | 3.2           | 0.948683298  | 0.8          | 0.316227766 |
|                | 7.8              | 1                | 9               | 0.9             | 90.3             | 17.3625          | 102.1            | 22.224           | 2.9          | 0.5          | 3.2           | 0.6          | 1.1          | 0.3         |
|                | 6.6              | 2.3              | 7.5             | 2.4             |                  |                  |                  |                  | 3.5          | 0.8          | 3.3           | 0.8          | 1.3          | 0.4         |
| 0.9            | 8.3              | 1.8              | 8.2             | 2.1             | 57.6             | 38.1             | 56.2             | 32.7             | 2.87         | 0.9          | 2.82          | 0.6          | 0.97         | 0.3         |
|                |                  |                  |                 |                 |                  |                  |                  |                  | 3.2          | 0.6          | 3.6           | 0.6          | 0.99         | 0.2         |

SUPPLEMENTARY DATA

| HDL_control_mean | HDL_control_sd | Trig_intervention_mean | Trig_intervention_sd | Trig_control_mean | Trig_control_sd | Weight_intervention_mean | Weight_intervention_sd | Weight_control_mean | Weight_control_sd | Systolic_intervention_mean | Systolic_intervention_sd | Systolic_control_mean | Systolic_control_sd | Diastolic_intervention_mean |
|------------------|----------------|------------------------|----------------------|-------------------|-----------------|--------------------------|------------------------|---------------------|-------------------|----------------------------|--------------------------|-----------------------|---------------------|-----------------------------|
|                  |                |                        |                      |                   |                 | 74.39                    | 11.4                   | 77.21               | 10.9              |                            |                          |                       |                     |                             |
|                  |                |                        |                      |                   |                 | 74.49                    | 11.5                   | 77.21               | 10.9              |                            |                          |                       |                     |                             |
| 1.04             | 0.227458034    | 2.2                    | 1.263655745          | 2.4               | 1.516386894     |                          |                        |                     |                   | 132                        | 17.69118043              | 132                   | 17.69118043         | 70                          |
| 1.125            | 0.2            | 1.9                    | 0.8                  | 1.9               | 0.8             | 79.8                     | 10.4                   | 81.5                | 9.9               | 133.9                      | 12                       | 138                   | 12                  | 83                          |
| 1.19             | 0.207846097    | 1.93                   | 0.436806593          | 2                 | 0.484974226     | 84.3                     | 18.92828571            | 84.3                | 17.32050808       | 127                        | 7.280109889              | 128                   | 6.92820323          |                             |
| 1.16             | 0.222485955    | 1.93                   | 0.436806593          | 2.17              | 0.519133894     | 84.3                     | 18.92828571            | 83.9                | 18.54049622       | 127                        | 7.280109889              | 129                   | 7.416198487         | 71                          |
|                  |                |                        |                      |                   |                 |                          |                        |                     |                   | 118                        | 14                       | 132                   | 13                  |                             |
| 0.93             | 0.566303316    | 1.55                   | 1.352890117          | 1.69              | 1.732716937     |                          |                        |                     |                   |                            |                          |                       |                     |                             |
| 1.32             | 0.27           | 2.12                   | 0.98                 | 2.09              | 1.58            | 77.8                     | 13.9                   | 78.1                | 14                |                            |                          |                       |                     |                             |
| 1.21542          | 0.28446        | 1.8064                 | 0.73385              | 1.97575           | 0.73385         | 73.3                     | 9.4                    | 73.8                | 10.6              |                            |                          |                       |                     |                             |
| 1.17             | 0.219089023    | 1.77                   | 0.985900604          | 1.68              | 0.985900604     |                          |                        |                     |                   |                            |                          |                       |                     |                             |
| 1.03829          | 0.376961536    | 1.88841                | 1.58391919           | 2.58106           | 1.723252738     | 76.251478                | 16.40487732            | 76.497015           | 15.07846146       |                            |                          |                       |                     |                             |
| 0.92594          | 0.273861279    | 1.88841                | 1.58391919           | 3.14476           | 1.588395417     | 76.251478                | 16.40487732            | 79.427204           | 13.69306394       |                            |                          |                       |                     |                             |
| 1.4              | 0.2            | 1.2                    | 0.2                  | 1.8               | 0.3             | 89.8                     | 9.8                    | 97.8                | 17.2              |                            |                          |                       |                     |                             |
| 1.08             | 0.28           | 1.33                   | 0.96                 | 1.86              | 1.12            | 83                       | 16.4                   | 83.2                | 14                |                            |                          |                       |                     |                             |
| 0.92             | 0.24           | 1.75                   | 0.7                  | 2.19              | 0.85            |                          |                        |                     |                   |                            |                          |                       |                     |                             |
| 0.98             | 0.26           | 1.25                   | 0.41                 | 1.61              | 0.68            | 64                       | 10                     | 65                  | 10                |                            |                          |                       |                     |                             |
| 1.24             | 0.261041912    | 2.27                   | 1.480669619          | 2                 | 1.416621096     | 99.7                     | 19.67231557            | 98.3                | 14.4222051        | 130                        | 15.73785246              | 129                   | 16.58553587         | 73                          |
| 1.01             | 0.20688        | 1.68                   | 0.84675              | 2.04              | 1.07255         | 102.3                    | 19                     | 101.1               | 18.3              |                            |                          |                       |                     |                             |
| 1                | 0.19           | 1.66                   | 0.36                 | 2.26              | 1.12            | 77.8                     | 13.1                   | 80.2                | 13.2              |                            |                          |                       |                     |                             |
| 1                | 0.19           | 1.58                   | 0.33                 | 2.26              | 1.12            | 78.1                     | 9.9                    | 80.2                | 13.2              |                            |                          |                       |                     |                             |
| 0.78             | 0.18973666     | 1.84                   | 0.948683298          | 2.46              | 1.138419958     | 86.8                     | 12.33288287            | 86.9                | 11.70042734       |                            |                          |                       |                     |                             |
|                  |                | 1.11                   | 0.4                  | 1.39              | 0.59            |                          |                        |                     |                   |                            |                          |                       |                     |                             |
| 0.68             | 0.113137085    | 2.55                   | 0.876812409          | 3.25              | 0.791959595     | 87.8                     | 12.16223664            | 87.6                | 11.3137085        |                            |                          |                       |                     |                             |
| 0.95             | 0.2            | 1.16                   | 0.59                 | 1.37              | 0.59            | 68.7                     | 11.6                   | 68.9                | 11.9              |                            |                          |                       |                     |                             |
| 1.2              | 0.387298335    | 1.6                    | 0.774596669          | 1.6               | 0.774596669     |                          |                        |                     |                   | 126                        | 7.745966692              | 130                   | 11.61895004         | 75                          |
| 0.8              | 0.316227766    | 1.1                    | 0.632455532          | 1.4               | 0.063245553     | 76.1                     | 13.28156617            | 76.1                | 13.28156617       |                            |                          |                       |                     |                             |
| 1.1              | 0.3            | 1.8                    | 0.6                  | 1.9               | 0.8             |                          |                        |                     |                   |                            |                          |                       |                     |                             |
| 1.3              | 0.3            | 2                      | 1.1                  | 1.9               | 1.2             |                          |                        |                     |                   | 124                        | 8                        | 129                   | 11                  | 73                          |
| 1                | 0.3            | 1.8                    | 0.9                  | 1.78              | 0.9             | 87.3                     | 14.7                   | 87                  | 14.7              |                            |                          |                       |                     |                             |
| 0.9              | 0.2            |                        |                      |                   |                 |                          |                        |                     |                   |                            |                          |                       |                     |                             |

## SUPPLEMENTARY DATA

| Diastolic_interve<br>ntion_sd | Diastolic_control<br>_mean | Diastolic_control<br>_sd |
|-------------------------------|----------------------------|--------------------------|
|-------------------------------|----------------------------|--------------------------|

|             |    |             |
|-------------|----|-------------|
| 7.581934469 | 72 | 10.10924596 |
| 8           | 83 | 8           |
| 8           | 83 | 6           |

|             |    |             |
|-------------|----|-------------|
| 9.836157786 | 73 | 10.09554357 |
|-------------|----|-------------|

|             |    |             |
|-------------|----|-------------|
| 7.745966692 | 78 | 3.872983346 |
|-------------|----|-------------|

|   |    |    |
|---|----|----|
| 8 | 76 | 11 |
|---|----|----|

SUPPLEMENTARY DATA

**Supplementary Table 5. Sensitivity analyses of high-MUFA vs. high-CHO diets in type 2 diabetes patients, after excluding trials resulting in significant weight differences**

| Metabolic parameter             | WMD (95% CI) <sup>1</sup>   | WMD (95% CI) <sup>2</sup>   | <i>I</i> <sup>2</sup> | <i>P</i> <sub>het</sub> |
|---------------------------------|-----------------------------|-----------------------------|-----------------------|-------------------------|
| HbA1c (%)                       | 0.00 (-0.08, 0.09)          | 0.00 (-0.09, 0.09)          | 0.0%                  | 0.965                   |
| Fasting plasma glucose (mmol/L) | <b>-0.44 (-0.74, -0.14)</b> | <b>-0.44 (-0.74, -0.14)</b> | 0.0%                  | 0.682                   |
| Fasting insulin (pmol/L)        | -4.99 (-13.83, 3.85)        | -3.98 (-9.83, 1.87)         | 0.0%                  | 0.905                   |
| LDL cholesterol (mmol/L)        | -0.01 (-0.10, 0.07)         | -0.01 (-0.10, 0.07)         | 0.0%                  | 0.816                   |
| HDL cholesterol (mmol/L)        | 0.03 (-0.01, 0.06)          | 0.03 (-0.01, 0.06)          | 0.0%                  | 0.884                   |
| Triglycerides (mmol/L)          | <b>-0.19 (-0.29, -0.10)</b> | <b>-0.19 (-0.29, -0.10)</b> | 0.0%                  | 0.781                   |
| Body weight (kg)                | 0.04 (-2.40, 2.47)          | 0.04 (-2.40, 2.47)          | 0.0%                  | 1.000                   |
| Systolic blood pressure (mmHg)  | -1.69 (-3.45, 0.07)         | -1.74 (-3.71, 0.24)         | 9.3%                  | 0.356                   |
| Diastolic blood pressure (mmHg) | <b>-2.93 (-5.28, -0.59)</b> | -3.74 (-8.08, 0.60)         | 69.5%                 | 0.020                   |

CI: confidence interval; HbA1c: glycated hemoglobin; HDL: high-density lipoprotein; LDL: low-density lipoprotein; WMD: weighted mean difference

Bolded values indicate statistical significance at  $P < 0.05$ .

**Notes:**

[1] Calculated using a fixed-effects model.

[2] Calculated using a random-effects model.



SUPPLEMENTARY DATA

**Supplementary Table 6. Sensitivity analyses of high-MUFA vs. high-CHO diets in type 2 diabetes patients, after excluding trials with less than 12 weeks duration**

| Metabolic parameter             | WMD (95% CI) <sup>1</sup>   | WMD (95% CI) <sup>2</sup>   | I <sup>2</sup> | P <sub>het</sub> |
|---------------------------------|-----------------------------|-----------------------------|----------------|------------------|
| HbA1c (%)                       | -0.08 (-0.16, 0.00)         | -0.14 (-0.30, 0.02)         | 63.6%          | 0.003            |
| Fasting plasma glucose (mmol/L) | <b>-0.59 (-0.81, -0.37)</b> | <b>-0.53 (-0.84, -0.23)</b> | 40.6%          | 0.087            |
| Fasting insulin (pmol/L)        | -3.77 (-11.32, 3.78)        | -3.86 (-12.50, 4.78)        | 15.6%          | 0.315            |
| LDL cholesterol (mmol/L)        | 0.01 (-0.08, 0.09)          | 0.10 (-0.10, 0.30)          | 75.8%          | <0.001           |
| HDL cholesterol (mmol/L)        | <b>0.09 (0.06, 0.11)</b>    | <b>0.09 (0.03, 0.14)</b>    | 68.5%          | 0.001            |
| Triglycerides (mmol/L)          | <b>-0.30 (-0.39, -0.22)</b> | <b>-0.36 (-0.57, -0.15)</b> | 79.1%          | <0.001           |
| Body weight (kg)                | <b>-1.81 (-3.27, -0.35)</b> | <b>-1.81 (-3.27, -0.35)</b> | 0.0%           | 0.976            |
| Systolic blood pressure (mmHg)  | <b>-2.16 (-3.74, -0.58)</b> | <b>-2.22 (-4.28, -0.16)</b> | 27.9%          | 0.226            |
| Diastolic blood pressure (mmHg) | -1.08 (-2.78, 0.61)         | -2.72 (-6.84, 1.39)         | 75.9%          | 0.006            |

CI: confidence interval; HbA1c: glycated hemoglobin; HDL: high-density lipoprotein; LDL: low-density lipoprotein; WMD: weighted mean difference

Bolded values indicate statistical significance at  $P < 0.05$ .

**Notes:**

[1] Calculated using a fixed-effects model.

[2] Calculated using a random-effects model.

SUPPLEMENTARY DATA

**Supplementary Table 7. Food patterns in published studies**

| Comparison                    | Trial arms               | Statistical difference between intakes of foods in the two diets <i>P</i> -values) |                                  |                                 |                                |                                |                                |         |
|-------------------------------|--------------------------|------------------------------------------------------------------------------------|----------------------------------|---------------------------------|--------------------------------|--------------------------------|--------------------------------|---------|
|                               |                          | Cereals                                                                            | Vegetables                       | Fruits                          | Fiber                          | Meat                           | Dairy                          | Seafood |
| <u>High-MUFA vs. High-CHO</u> |                          |                                                                                    |                                  |                                 |                                |                                |                                |         |
| Lasa 2014 (13)                | MUFA (olive oil) vs. LF  | NS                                                                                 | 0.029,<br>higher in<br>MUFA arm  | 0.029,<br>higher in<br>MUFA arm | NA                             | NS                             | NS                             | NS      |
| Lasa 2014 (13)                | MUFA (nuts) vs. LF       | NS                                                                                 | NS                               | NS                              | NA                             | NS                             | 0.003,<br>higher in<br>CHO arm | NS      |
| Itsiopoulos 2011 (14)         | MED vs. control          | NS                                                                                 | <0.001,<br>higher in<br>MUFA arm | NS                              | NA                             | <0.01,<br>higher in<br>CHO arm | <0.01,<br>higher in<br>CHO arm | NS      |
| Elhayany 2010 (15)            | MED (low-carb) vs. LF    | NA                                                                                 | NA                               | NA                              | higher in<br>MUFA arm          | NA                             | NA                             | NA      |
| Elhayany 2010 (15)            | MED (traditional) vs. LF | NA                                                                                 | NA                               | NA                              | higher in<br>MUFA arm          | NA                             | NA                             | NA      |
| Brehm 2009 (16)               | MUFA vs. CHO             | NA                                                                                 | NA                               | 0.012,<br>higher in<br>CHO arm  | NA                             | NA                             | NA                             | NA      |
| Esposito 2009 (17)            | MED vs. LF               | NA                                                                                 | NA                               | NA                              | NA                             | NA                             | NA                             | NA      |
| Wolever 2008 (18, 19)         | MUFA vs. HGI             | higher in<br>CHO arm                                                               | NA                               | higher in<br>MUFA arm           | NA                             | NA                             | NA                             | NA      |
| Wolever 2008 (18, 19)         | MUFA vs. LGI             | higher in<br>CHO arm                                                               | NA                               | higher in<br>MUFA arm           | higher in<br>CHO arm           | NA                             | NA                             | NA      |
| Brunerova 2007 (20)           | MUFA vs. CHO             | NA                                                                                 | NA                               | NA                              | NA                             | NA                             | NA                             | NA      |
| Leon-Sanz 2005 (21)           | MUFA vs. CHO             | NS                                                                                 | NS                               | NS                              | NS                             | NS                             | NS                             | NS      |
| Shah 2005 (22)                | MUFA vs. CHO             | NA                                                                                 | NA                               | NA                              | higher in<br>CHO arm           | NA                             | NA                             | NA      |
| Gerhard 2004 (23)             | MUFA vs. LF              | NA                                                                                 | NA                               | NA                              | NA                             | NA                             | NA                             | NA      |
| Rodriguez-Villar 2004 (24)    | MUFA vs. CHO             | NA                                                                                 | NA                               | NA                              | 0.001,<br>higher in<br>CHO arm | NA                             | NA                             | NA      |
| Lovejoy 2002 (25)             | HF vs LF                 | NA                                                                                 | NA                               | NA                              | higher in<br>MUFA arm          | NA                             | NA                             | NA      |
| Rodriguez-Villar 2000 (26)    | MUFA vs. CHO             | NA                                                                                 | NA                               | NA                              | 0.035,<br>higher in<br>CHO arm | NA                             | NA                             | NA      |
| Tsihlias 2000 (27)            | MUFA vs. HGI             | NA                                                                                 | NA                               | NA                              | NS                             | NA                             | NA                             | NA      |
| Tsihlias 2000 (27)            | MUFA vs. LGI             | NA                                                                                 | NA                               | NA                              | higher in<br>CHO arm           | NA                             | NA                             | NA      |
| Gumbiner 1998 (28)            | MUFA vs. CHO             | NA                                                                                 | NA                               | NA                              | NA                             | NA                             | NA                             | NA      |
| McCargar 1998 (29)            | MUFA vs. CHO             | NA                                                                                 | NA                               | NA                              | NS                             | NA                             | NA                             | NA      |
| Campbell 1994 (30)            | MUFA vs. CHO             | NA                                                                                 | NA                               | NA                              | NS                             | NA                             | NA                             | NA      |
| Garg 1994 (31)                | MUFA vs. CHO             | NA                                                                                 | NA                               | NA                              | higher in<br>CHO arm           | NA                             | NA                             | NA      |
| Lerman-Garber 1994 (32)       | MUFA vs. CHO             | NA                                                                                 | NA                               | NA                              | higher in<br>CHO arm           | NA                             | NA                             | NA      |
| Rasmussen 1993 (33)           | MUFA vs. CHO             | NA                                                                                 | NA                               | NA                              | NS                             | NA                             | NA                             | NA      |
| Garg 1992 (34)                | MUFA vs. CHO             | NA                                                                                 | NA                               | NA                              | NS                             | NA                             | NA                             | NA      |
| Parillo 1992 (35)             | MUFA vs. CHO             | NA                                                                                 | NA                               | NA                              | NS                             | NA                             | NA                             | NA      |
| Rivellese 1990 (36)           | MUFA vs. CHO             | NA                                                                                 | NA                               | NA                              | NS                             | NA                             | NA                             | NA      |
| Garg 1988 (37)                | MUFA vs. CHO             | NA                                                                                 | NA                               | NA                              | NA                             | NA                             | NA                             | NA      |

## SUPPLEMENTARY DATA

NS: not significant; NA: not available

Bolded values indicate statistical significance at  $P < 0.05$ .

**Notes:**

[1] For cross-over trials, the sample size is double the number of actual participants, since each participant received both interventions.
